# Supplementary material for: Association between hypertension and hearing impairment in health check-ups among Japanese workers: a cross-sectional study
Source: PubMed Central journal article supplement — BMJ Open. 2019 Apr 24;9(4):e028392. doi: 10.1136/bmjopen-2018-028392 (PMC6502007; doi:10.1136/bmjopen-2018-028392), 2019-04-24
Supplement: bmjopen-2018-028392.draft_revisions.pdf [file bmjopen-2018-028392.draft_revisions.pdf]

# BMJ Open

BMJ Open is committed to open peer review. As part of this commitment we make the peer review history of every article we publish publicly available.

When an article is published we post the peer reviewers' comments and the authors' responses online. We also post the versions of the paper that were used during peer review. These are the versions that the peer review comments apply to.

The versions of the paper that follow are the versions that were submitted during the peer review process. They are not the versions of record or the final published versions. They should not be cited or distributed as the published version of this manuscript.

BMJ Open is an open access journal and the full, final, typeset and author-corrected version of record of the manuscript is available on our site with no access controls, subscription charges or pay-per-view fees (<http://bmjopen.bmj.com>).

If you have any questions on BMJ Open's open peer review process please email [editorial.bmjopen@bmj.com](mailto:editorial.bmjopen@bmj.com)

# BMJ Open

## Association between hypertension and hearing impairment in health check-ups among Japanese workers: a cross-sectional study

|                               |                                                                                                                                                                                                                                                                                                                                                                                         |
|-------------------------------|-----------------------------------------------------------------------------------------------------------------------------------------------------------------------------------------------------------------------------------------------------------------------------------------------------------------------------------------------------------------------------------------|
| Journal:                      | <i>BMJ Open</i>                                                                                                                                                                                                                                                                                                                                                                         |
| Manuscript ID                 | bmjopen-2018-028392                                                                                                                                                                                                                                                                                                                                                                     |
| Article Type:                 | Research                                                                                                                                                                                                                                                                                                                                                                                |
| Date Submitted by the Author: | 06-Dec-2018                                                                                                                                                                                                                                                                                                                                                                             |
| Complete List of Authors:     | Umesawa, Mitsumasa; Dokkyo Medical University, Public Health Sairenchi, Toshimi ; Dokkyo Medical University School of Medicine, Department of Public Health;<br>Haruyama, Yasuo; Dokkyo Medical University, Department of Public Health<br>Nagao, Masanori; Dokkyo Medical University, Public Health Kobashi, Gen; Dokkyo Medical University School of Medicine, Dept. of Public Health |
| Keywords:                     | Epidemiology < TROPICAL MEDICINE, cross-sectional study, Hypertension < CARDIOLOGY, hearing impairment                                                                                                                                                                                                                                                                                  |
|                               |                                                                                                                                                                                                                                                                                                                                                                                         |

SCHOLARONE™  
Manuscripts

1  
2  
3  
4  
5 **Association between hypertension and hearing impairment in health check-ups**  
6  
7  
8 **among Japanese workers: a cross-sectional study**  
9

10  
11  
12 Mitsumasa Umesawa, MD, PhD<sup>1</sup>, Toshimi Sairenchi, PhD<sup>1</sup>, Yasuo Haruyama, MD,  
13  
14 PhD<sup>1</sup>, Masanori Nagao, PhD<sup>1</sup>, Gen Kobashi, MD, PhD<sup>1</sup>  
15  
16

17  
18  
19 <sup>1</sup> Department of Public Health, Dokkyo Medical University  
20  
21  
22

23  
24  
25  
26 **Corresponding author**  
27

28 Mitsumasa Umesawa  
29

30  
31 Department of Public Health, Dokkyo Medical University, Mibu 321-0293, Japan  
32

33 Tel.: +81-282-87-2133  
34

35 Fax: +81-282-86-2935  
36

37 Email: umesawa@dokkyomed.ac.jp  
38  
39  
40  
41

42 Word count: 2101 words  
43  
44  
45  
46  
47  
48  
49  
50  
51  
52  
53  
54  
55  
56  
57  
58  
59  
60

## Abstract

**Objectives:** Prevention of hearing impairment (HI) is important because recovery of hearing is typically difficult. Epidemiological studies have examined the risk factors for HI. However, the association between hypertension and HI were not consistent. The current study aimed to clarify the association between hypertension and HI.

**Design:** Cross-sectional study.

**Setting:** Japanese workers in an information and communication technologies company.

**Participants:** There were 24,823 employees of the same company. Of these, we recruited 13,475 participants who underwent hearing testing by audiometry in annual health checkups and did not have missing data regarding body measurement, blood test results, and drinking/smoking status (mean age: 49.4 years; males: 86.4%).

**Primary outcomes:** Hearing tests were performed at two frequencies (1 kHz, 4 kHz). We defined the inability of participants to respond to 30 dB at 1 kHz and/or 40 dB at 4 kHz as overall moderate HI. Likewise, we defined moderate HI at 1 kHz (4 kHz) as an abnormal finding at 1 kHz (4 kHz). We defined hypertension as  $\geq 140$  mmHg systolic blood pressure and/or  $\geq 90$  mmHg diastolic blood pressure and/or taking medication for hypertension. We examined the association between hypertension and HI after adjusting for age, sex, body mass index, smoking/drinking status, diabetes mellitus, hyperlipidemia and proteinuria.

**Results:** Moderate HI was noted in 980 participants (7.3%). Of these, 441 participants (3.3%) exhibited moderate HI at 1 kHz, and 787 participants (5.8%) exhibited moderate HI at 4 kHz. Subjects with hypertension showed higher prevalence of any hearing impairment. The prevalence of overall moderate HI, moderate HI at 1 kHz and

1  
2  
3  
4  
5 moderate HI at 4 kHz among subjects with hypertension was 8.7%, 4.3% and 6.8%,  
6  
7 while those among subjects without hypertension was 6.9%, 3.0% and 5.6% ( $P < 0.01$ ,  
8  
9  $P < 0.01$  and  $P=0.01$ , respectively).  
10  
11

12 **Conclusions:** Hypertension was associated with moderate HI in Japanese workers.  
13

14 (300/300 words)  
15  
16  
17  
18  
19  
20  
21  
22  
23  
24  
25  
26  
27  
28  
29  
30  
31  
32  
33  
34  
35  
36  
37  
38  
39  
40  
41  
42  
43  
44  
45  
46  
47  
48  
49  
50  
51  
52  
53  
54  
55  
56  
57  
58  
59  
60

For peer review only

### Strength and limitations of this study

- The association between hypertension and hearing impairment was examined in several epidemiological studies; however, the results were not consistent.
- This study was based on annual health check-ups which were conducted according to Japanese law; therefore, study participants comprised both healthy and unhealthy people.
- Our research was unable to use precise information on hearing tests compared with tests conducted in hospitals because this study is based on health check-ups that are mandated by law.

## Introduction

Hearing impairment (HI) is a common condition among older people. The Global Burden of Disease Study estimated that HI is one of eight chronic diseases and injuries affecting more than 10% of the world's population[1]. According to the World Health Organization (WHO) fact sheet published in February 2017, almost one-third of people aged 65 years or older have HI.

Prevention of HI is important in public health not only because HI makes communication difficult, but also because it is associated with death, depression and dementia[2-6]. A recent review reported that HI in midlife (45–65 years old) is associated with the risk of dementia in future[7].

Recovery from HI is typically difficult, and several epidemiological studies have been conducted in an attempt to identify the risk factors for HI. Many risk factors for HI have been identified, including aging, exposure to loud noise, and medication. Of these, many studies have examined the associations between cardiovascular risk factors and HI. A meta-analysis of 13 cross-sectional studies revealed that, compared with participants without a diabetic condition, a higher prevalence of HI was observed in diabetic patients[8]. For serum lipids, compared with male participants who had a lower high-density lipoprotein (HDL) cholesterol concentration, hearing levels at high frequencies were significantly better among male participants with a higher HDL cholesterol concentration[9]. With regard to hypertension, several epidemiological studies examined the association between hypertension and HI. However, the results of these studies were inconsistent[10-14]. Cross-sectional studies in Korea reported a positive association between hypertension and HI[10]. Same association was observed in Indian workers in the iron and steel industries[11]. A case-control study in Brazil also

1  
2  
3  
4  
5 reported a positive association between hypertension and hearing loss[12]. A  
6  
7 preliminary study in Mexico reported that hypertensive participants exhibited HI in  
8  
9 relation to 8 kHz pure tone sound, compared with participants without hypertension[13].  
10  
11 However, a cross-sectional study of Hispanic/Latino participants in the United States  
12  
13 found no such association[14].  
14  
15

16  
17 Therefore, we aimed to examine the association between hypertension and HI  
18  
19 in Japan, which has a substantially higher prevalence of hypertension compared with  
20  
21 Western countries. If hypertension is positively associated with HI, early intervention  
22  
23 for hypertension may be beneficial for preventing HI. We hypothesized that  
24  
25 hypertension would be positively associated with HI. To test this hypothesis, we  
26  
27 conducted an association study among Japanese workers.  
28  
29  
30  
31  
32  
33  
34  
35  
36  
37  
38  
39  
40  
41  
42  
43  
44  
45  
46  
47  
48  
49  
50  
51  
52  
53  
54  
55  
56  
57  
58  
59  
60



## Methods

### *Participants*

Participants were 18-to-81-year-old employees of Fujitsu Limited, an information and communication technologies company. We recruited a total of 24,823 participants (20,732 men and 4,091 women) who underwent annual health check-ups between 2010 and 2016. In participants who had undergone annual health check-ups twice or more, we analyzed the latest data. We excluded 9,857 participants who did not undergo hearing tests using audiometry from the analysis. In addition, we excluded 1,425 participants who had missing data regarding body measurement, blood test results, and information about drinking/smoking status, and 66 participants who worked in noisy environments or were advised by a medical doctor to undergo a thorough examination. Consequently, we included data from 13,475 participants (11,636 males and 1,839 females) in the final analyses. (Figure 1)

We used anonymized data with the permission of Fujitsu Limited. The study was approved by the Ethics Committee of Dokkyo Medical University (Univ-28018).

### *Risk factor survey*

The annual health check-up was conducted as required by the Industrial Safety and Health Act under Japanese law. The check-up consisted of body height and weight measurement with light clothing, ascertaining medical history, drinking/smoking status, a hearing test, a vision test, blood pressure measurement, blood tests, and the dipstick urine tests. Participants had their blood pressure levels measured by automated sphygmomanometers on the right arm. If the blood pressure level was high, the measurement was repeated. The hearing test was performed using audiometry. In

1  
2  
3  
4  
5 accordance with Japanese law, two categories of hearing tests were applied at 1 kHz and  
6  
7 4 kHz for each ear. Inability to respond to 30 dB at 1 kHz and/or 40 dB at 4 kHz was  
8  
9 defined as the threshold for “abnormal”. In addition, 11,133 of 13,475 participants  
10  
11 tested their hearing thresholds every 5 dB between –10 dB and 90 dB in 1 kHz and 4  
12  
13 kHz. We calculated the average hearing threshold as an average of 1 kHz and 4 kHz in  
14  
15 kHz. We calculated the average hearing threshold as an average of 1 kHz and 4 kHz in  
16  
17 both ears. For HbA1c, the National Glycohemoglobin Standardization Program (NGSP)  
18  
19 value was used.  
20  
21  
22

### 23 24 *Definition of variables*

25  
26 We defined hypertension as  $\geq 140$  mmHg systolic blood pressure and/or  $\geq 90$  mmHg  
27  
28 diastolic blood pressure and/or taking medication for hypertension. For HI, we defined a  
29  
30 participant as having overall moderate HI (overall moderate HI), if there was an  
31  
32 abnormal finding in any one category. Likewise, we defined moderate HI at 1 kHz (4  
33  
34 kHz) as an abnormal finding at 1 kHz (4 kHz). Also, we defined average mild HI as an  
35  
36 average hearing threshold  $>20$  dB and  $\leq 40$  dB, and defined average moderate to severe  
37  
38 HI as an average hearing threshold more than 40 dB. For other variables, we defined  
39  
40 diabetes mellitus as  $\geq 6.5\%$  HbA1c and/or taking medication for diabetes mellitus, high  
41  
42 serum cholesterol level as  $\geq 220$  mg/dl and/or taking medication for  
43  
44 hypercholesterolemia, and proteinuria as dipstick proteinuria 1+ or more in a urine test.  
45  
46 Body mass index (BMI) values were calculated as follows: weight in kilograms divided  
47  
48 by height in meters squared.  
49  
50  
51  
52  
53

### 54 55 56 *Statistical analysis*

57  
58 We calculated the characteristics of participants according to presence of hypertension.  
59  
60

1  
2  
3  
4  
5 The characteristics included variables as age, sex, BMI, systolic and diastolic blood  
6 pressure, blood test, dipstick proteinuria, current smoking, current drinking, and  
7 medication for hypertension, hypercholesterolemia, and diabetes mellitus. Blood test  
8 included HbA1c level and serum lipid level. We calculated age and sex-adjusted  
9 prevalence of overall moderate HI and moderate HI at 1 kHz and 4 kHz according to the  
10 presence of hypertension (model 1). We also calculated their multivariable-adjusted  
11 prevalence. We used confounding variables for adjustment that included age, sex, BMI  
12 (kg/m<sup>2</sup>), current drinker (yes or no), and current smoker (yes or no) in model 2. For  
13 model 3, we used confounding variables in model 2 and diabetes mellitus (yes or no),  
14 and hypercholesterolemia (yes or no). We also examined the association between  
15 hypertension and average mild or moderate to severe HI. We tested for sex interaction  
16 in each analysis and found no significant interactions.

17  
18  
19  
20  
21  
22  
23  
24  
25  
26  
27  
28  
29  
30  
31  
32  
33 We used SAS version 9.4 software (SAS Institute, Cary, NC) for all analyses.

34  
35 *P*-values <0.05 were regarded as statistically significant.

#### 36 37 38 39 40 *Patient and Public involvement*

41  
42 This study did not involve patient and public.  
43  
44  
45  
46  
47  
48  
49  
50  
51  
52  
53  
54  
55  
56  
57  
58  
59  
60

## Results

Among 13,475 participants in the current study, 980 (7.3%) exhibited overall moderate HI. A total of 441 participants (3.3%) exhibited moderate HI at 1 kHz, and 787 participants (5.8%) exhibited moderate HI at 4 kHz. A total of 248 participants (1.8%) exhibited HI at both 1 kHz and 4 kHz. Among 11,133 participants in which average hearing threshold was calculated, 1,734 participants (15.6%) exhibited average mild HI and 145 participants (1.3%) exhibited average moderate to severe HI.

Table 1 shows the characteristics of participants according to the presence of hypertension. Compared with participants who did not have hypertension, participants with hypertension were older, with higher BMI values, higher blood pressure levels, and higher HbA1c levels. In addition, hypertensive participants were more likely to be male, more likely to take medication for diabetes mellitus and hypercholesterolemia, and less likely to have proteinuria.

Table 2 shows the prevalence of moderate HI according to the presence of hypertension. Compared with participants who did not have hypertension, participants with hypertension showed a higher prevalence of overall moderate HI and its subtypes. The prevalence of overall moderate HI among hypertensive participants was 8.7%, while that among participants who did not have hypertension was 6.9% (*P*-values for difference < 0.01). The prevalence rates of moderate HI at 1 kHz and 4 kHz among hypertensive participants were 4.3% and 6.8%, respectively, while those among participants who did not have hypertension were 3.0% and 5.6% (*P*-values for differences were <0.01 and 0.01).

Table 3 shows the associations between hypertension and average mild HI and average moderate to severe HI among participants for whom average hearing threshold

1  
2  
3  
4  
5 was calculated. After adjustment for confounding variables including diabetes mellitus  
6  
7  
8 and hypercholesterolemia, the prevalence rates of average mild HI and average  
9  
10 moderate to severe HI were 17.1% and 1.5% among participants with hypertension,  
11  
12 while the prevalence rates were 15.1% and 1.2% among participants without  
13  
14 hypertension (*P*-values for difference were 0.02 and 0.44).  
15  
16

17 We also examined the association between hypertension and HI according to the  
18  
19 number of ears with overall moderate HI. Participants with hypertension showed  
20  
21 significantly higher prevalence of bilateral overall moderate HI, but not unilateral  
22  
23 overall moderate HI, compared with participants without hypertension. The prevalence  
24  
25 rates of bilateral overall moderate HI were 3.2% for hypertensive participants and 2.2%  
26  
27 for non-hypertensive participants (*P*-value for the difference was <0.01), while those for  
28  
29 unilateral overall moderate HI were 5.5% and 4.7%, respectively (*P*-value for difference  
30  
31 = 0.09).  
32  
33  
34  
35  
36  
37  
38  
39  
40  
41  
42  
43  
44  
45  
46  
47  
48  
49  
50  
51  
52  
53  
54  
55  
56  
57  
58  
59  
60

## Discussion

The current study revealed that participants with hypertension showed significantly higher prevalence of HI in all ranges, at both 1 kHz and 4 kHz, compared with participants without hypertension. In addition, participants with hypertension exhibited a higher prevalence of average mild HI compared with participants without hypertension. However, no association was found between hypertension and average moderate to severe HI.

A previous cross-sectional study in Korea revealed that hypertension was positively associated with the prevalence of HI[10]. Compared with participants without hypertension, odds ratios (ORs) and 95% confidence intervals (95% CIs) of participants with hypertension were 1.24 (1.10–1.42) for low/mid frequency mild HI, defined as an unaided pure tone hearing level for the superior ear of 26 to 40 dB in 0.5, 1.0 and 2.0 kHz conditions, and 1.29 (1.16–1.45) for high frequency mild HI, defined in the same way in 3.0, 4.0 and 6.0 kHz conditions. In addition, a previous study in Korea reported that ORs and 95% CIs of participants with hypertension were 1.19 (1.02–1.39) for low/mid frequency moderate-to-profound HI defined as an unaided pure tone hearing level for the superior ear of 41 dB or more in 0.5, 1.0 and 2.0 kHz conditions, and 1.20 (1.07–1.35) for high frequency moderate-to-profound HI, defined in the same way in 3.0, 4.0 and 6.0 kHz conditions. In the present study, the results revealed that participants with hypertension had a higher prevalence of HI for both 1 kHz and 4 kHz stimuli. We found a positive association between hypertension and the prevalence of mild HI. However, the association between hypertension and the prevalence of moderate to severe HI was not significant. A cross-sectional study of Hispanic/Latino participants in the United States reported that the association between hypertension and

1  
2  
3  
4  
5 total HI was not significant, but the association between hypertension and bilateral HI  
6 was significant[14]. In the present study, participants with hypertension showed  
7 significantly higher prevalence of bilateral HI, but not unilateral HI.  
8  
9

10  
11  
12 The mechanism underlying the association between hypertension and HI is  
13 uncertain, but our findings and those of previous studies imply that micro-vessel  
14 damage may lead to HI. Hypertension is one of the major risk factors of atherosclerosis  
15 and stroke[15, 16]. The inner ear depends on the supply of oxygen and nutrition in the  
16 labyrinthine artery. This artery is a thin branch of the anterior inferior cerebellar artery.  
17 Therefore, micro-vessel atherosclerosis caused by hypertension may be associated with  
18 a reduction in the level of oxygen and the nutrition supply for the inner ear. In addition,  
19 hypertension may be associated with brain damage. In the present study, the effect of  
20 hypertension on HI was clear for bilateral HI. We assumed that hypertension may  
21 damage not only the inner ear but also the primary auditory cortex.  
22  
23  
24  
25  
26  
27  
28  
29  
30  
31  
32  
33  
34

35 The present study had several limitations that should be considered. First, the  
36 cross-sectional design of the present study did not allow us to establish a causal  
37 relationship. Second, we were unable to evaluate the association between hypertension  
38 and hearing thresholds other than 1 kHz and 4 kHz, because this study was based on  
39 annual health check-ups, whose items were prescribed by Japanese law. Third, we were  
40 unable to evaluate the precise history of noise exposure because the data were  
41 anonymous and did not contain a precise history of noise exposure before 2010.  
42 Therefore, the present study design did not enable us to comprehensively evaluate the  
43 effects of noise exposure. In addition, we could not adjusted work-related factors  
44 because of anonymity. Finally, because the current study was based on the results of  
45 annual health check-ups in a single company, the generalizability of our findings is  
46  
47  
48  
49  
50  
51  
52  
53  
54  
55  
56  
57  
58  
59  
60

1  
2  
3  
4  
5 unclear.  
6  
7

8 In conclusion, hypertension was positively associated with the prevalence of  
9  
10 HI in Japanese workers. The association was evident for mild HI and bilateral HI.  
11  
12 Further studies are necessary to confirm this finding.  
13  
14  
15  
16  
17  
18  
19  
20  
21  
22  
23  
24  
25  
26  
27  
28  
29  
30  
31  
32  
33  
34  
35  
36  
37  
38  
39  
40  
41  
42  
43  
44  
45  
46  
47  
48  
49  
50  
51  
52  
53  
54  
55  
56  
57  
58  
59  
60

For peer review only



## Acknowledgments

We thank Benjamin Knight, MSc., from Edanz Group ([www.edanzediting.com/ac](http://www.edanzediting.com/ac)) for editing a draft of this manuscript.

## Funding

This work was supported by JSPS Grant Number JP17K18051.

## Contributors

MU and GK designed this study. MU and GK made data set. MU, TS, YH, MN and GK analyzed the data. MU wrote the first draft of the manuscript. MH, TS, YH, MN, MM and GK commented on the manuscript.

## Competing interests

None declared.

## Data sharing statement

No additional data are available.

## References

1. GBD 2015 Disease and Injury Incidence and Prevalence Collaborators. Global, regional, and national incidence, prevalence, and years lived with disability for 310 diseases and injuries, 1990-2015: a systematic analysis for the Global Burden of Disease Study 2015. *Lancet*. 2016;388:1545-602.
2. Lin FR, Metter EJ, O'Brien RJ, et al. Hearing loss and incident dementia. *Arch Neurol*. 2011;68:214-20.
3. Davies HR, Cadar D, Herbert A, et al. Hearing Impairment and Incident Dementia: Findings from the English Longitudinal Study of Ageing. *J Am Geriatr Soc*. 2017;65:2074-81.
4. Deal JA, Betz J, Yaffe K, et al. Hearing Impairment and Incident Dementia and Cognitive Decline in Older Adults: The Health ABC Study. *J Gerontol A Biol Sci Med Sci*. 2017;72:703-9.
5. Contrera KJ, Betz J, Genther DJ, et al. Association of Hearing Impairment and Mortality in the National Health and Nutrition Examination Survey. *JAMA Otolaryngol Head Neck Surg*. 2015;141:944-6.
6. Li CM, Zhang X, Hoffman HJ, et al. Hearing impairment associated with depression in US adults, National Health and Nutrition Examination Survey 2005-2010. *JAMA Otolaryngol Head Neck Surg*. 2014;140:293-302.
7. Livingston G, Sommerlad A, Orgeta V, et al. Dementia prevention, intervention, and care. *Lancet*. 2017;390:2673-734
8. Horikawa C, Kodama S, Tanaka S, et al. Diabetes and risk of hearing impairment in adults: a meta-analysis. *J Clin Endocrinol Metab*. 2013;98:51-8.
9. Suzuki K, Kaneko M, Murai K. Influence of serum lipids on auditory function.

1  
2  
3  
4  
5  
6  
7  
8  
9  
10  
11  
12  
13  
14  
15  
16  
17  
18  
19  
20  
21  
22  
23  
24  
25  
26  
27  
28  
29  
30  
31  
32  
33  
34  
35  
36  
37  
38  
39  
40  
41  
42  
43  
44  
45  
46  
47  
48  
49  
50  
51  
52  
53  
54  
55  
56  
57  
58  
59  
60

*Laryngoscope*. 2000;110:1736-8.

10. Hong JW, Jeon JH, Ku CR, et al. The prevalence and factors associated with hearing impairment in the Korean adults: the 2010-2012 Korea National Health and Nutrition Examination Survey (observational study). *Medicine (Baltimore)*. 2015;94:e611.
11. Narlawar UW, Surjuse BG, Thakre SS. Hypertension and hearing impairment in workers of iron and steel industry. *Indian J Physiol Pharmacol*. 2006;50:60-6.
12. de Moraes Marchiori LL, de Almeida Rego Filho E, Matsuo T. Hypertension as a factor associated with hearing loss. *Braz J Otorhinolaryngol*. 2006;72:533-40.
13. Esparza CM, Jáuregui-Renaud K, Morelos CM, et al. Systemic high blood pressure and inner ear dysfunction: a preliminary study. *Clin Otolaryngol*. 2007;32:173-8.
14. Cruickshanks KJ, Dhar S, Dinces E, et al. Hearing Impairment Prevalence and Associated Risk Factors in the Hispanic Community Health Study/Study of Latinos. *JAMA Otolaryngol Head Neck Surg*. 2015;141:641-8.
15. Kitamura A, Iso H, Imano H, et al. Prevalence and correlates of carotid atherosclerosis among elderly Japanese men. *Atherosclerosis*. 2004;172:353-9.
16. Matsunaga M, Yatsuya H, Iso H, et al. Similarities and differences between coronary heart disease and stroke in the associations with cardiovascular risk factors: The Japan Collaborative Cohort Study. *Atherosclerosis*. 2017;261:124-30.

Table 1 Characteristics of subjects according to hypertension status

|                                                     | Subjects without hypertension |   |     | Subjects with hypertension |   |     | P for difference |
|-----------------------------------------------------|-------------------------------|---|-----|----------------------------|---|-----|------------------|
| N                                                   | 10437                         |   |     | 3038                       |   |     |                  |
| Age (years) <sup>1</sup>                            | 48.7                          | ± | 5.6 | 51.6                       | ± | 5.1 | <0.01            |
| Men (%)                                             | 84.2                          |   |     | 93.7                       |   |     | <0.01            |
| Body mass index (kg/m <sup>2</sup> ) <sup>2,3</sup> | 23.2                          | ± | 0.0 | 25.7                       | ± | 0.1 | <0.01            |
| Systolic blood pressure (mmHg) <sup>2,3</sup>       | 115.8                         | ± | 0.1 | 132.0                      | ± | 0.2 | <0.01            |
| Diastolic blood pressure (mmHg) <sup>2,3</sup>      | 72.2                          | ± | 0.1 | 85.5                       | ± | 0.2 | <0.01            |
| Medication for hypertension (%)                     | -                             |   |     | 63.4                       |   |     | -                |
| HbA1c (%) <sup>2,3</sup>                            | 5.6                           | ± | 0.0 | 5.8                        | ± | 0.0 | <0.01            |
| Medication for diabetes mellitus (%) <sup>2</sup>   | 3.0                           |   |     | 10.4                       |   |     | <0.01            |
| Total Cholesterol (mg/dl) <sup>2,3</sup>            | 207.0                         | ± | 0.3 | 205.4                      | ± | 0.6 | 0.03             |
| Triglyceride (mg/dl) <sup>2,3</sup>                 | 115.9                         | ± | 1.1 | 146.7                      | ± | 2.1 | <0.01            |
| Medication for dislipidemia (%) <sup>2</sup>        | 7.3                           |   |     | 18.8                       |   |     | <0.01            |
| Proteinuria (%) <sup>2</sup>                        | 3.6                           |   |     | 2.7                        |   |     | 0.02             |
| Current drinker (%) <sup>2</sup>                    | 74.9                          |   |     | 78.3                       |   |     | <0.01            |
| Current smoker (%) <sup>2</sup>                     | 22.0                          |   |     | 20.3                       |   |     | 0.06             |
| Total hearing impairment (%)                        | 6.2                           |   |     | 10.9                       |   |     | <0.01            |
| Hearing impairment in 1 kHz (%)                     | 2.7                           |   |     | 5.2                        |   |     | <0.01            |
| Hearing impairment in 4 kHz (%)                     | 5.0                           |   |     | 8.7                        |   |     | <0.01            |

<sup>1</sup> means ± standard deviation

<sup>2</sup> age, sex-adjusted

<sup>3</sup> means ± standard error

Table 2 Relationships between hypertension and hearing impairment

|                                                | Subjects without hypertension | Subjects with hypertension | P for difference |
|------------------------------------------------|-------------------------------|----------------------------|------------------|
| Total hearing impairment                       |                               |                            |                  |
| N                                              | 10437                         | 3038                       |                  |
| Cases                                          | 650                           | 330                        |                  |
| Prevalence (%)                                 |                               |                            |                  |
| Model 1 (age, sex-adjusted)                    | 6.8%                          | 9.0%                       | <0.01            |
| Model 2 (multivariable-adjusted <sup>1</sup> ) | 6.9%                          | 8.7%                       | <0.01            |
| Model 3 (multivariable-adjusted <sup>2</sup> ) | 6.9%                          | 8.7%                       | <0.01            |
| Hearing impairment in 1 kHz                    |                               |                            |                  |
| N                                              | 10437                         | 3038                       |                  |
| Cases                                          | 284                           | 157                        |                  |
| Prevalence (%)                                 |                               |                            |                  |
| Model 1 (age, sex-adjusted)                    | 2.9%                          | 4.5%                       | <0.01            |
| Model 2 (multivariable-adjusted <sup>1</sup> ) | 3.0%                          | 4.3%                       | <0.01            |
| Model 3 (multivariable-adjusted <sup>2</sup> ) | 3.0%                          | 4.3%                       | <0.01            |
| Hearing impairment in 4 kHz                    |                               |                            |                  |
| N                                              | 10437                         | 3038                       |                  |
| Cases                                          | 524                           | 263                        |                  |
| Prevalence (%)                                 |                               |                            |                  |
| Model 1 (age, sex-adjusted)                    | 5.5%                          | 7.1%                       | <0.01            |
| Model 2 (multivariable-adjusted <sup>1</sup> ) | 5.5%                          | 6.9%                       | 0.01             |
| Model 3 (multivariable-adjusted <sup>2</sup> ) | 5.6%                          | 6.8%                       | 0.01             |

<sup>1</sup> adjusted for age, sex, body mass index, current drinking (yes or no) and current smoking (yes or no)

<sup>2</sup> adjusted for factors in model 2 and diabetes mellitus (yes or no), hyperlipidemia (yes or no) and proteinuria (yes or no)

Table 3 Relationships between hypertension and hearing impairment according to average

|                                                                                          | Subjects without hypertension | Subjects with hypertension | P for difference |
|------------------------------------------------------------------------------------------|-------------------------------|----------------------------|------------------|
| Average mild hearing impairment (average hearing threshold >20dB and <=40dB)             |                               |                            |                  |
| N                                                                                        | 8602                          | 2531                       |                  |
| Cases                                                                                    | 1186                          | 548                        |                  |
| Prevalence (%)                                                                           |                               |                            |                  |
| Model 1 (age, sex-adjusted)                                                              | 14.8%                         | 18.2%                      | <0.01            |
| Model 2 (multivariable-adjusted <sup>1</sup> )                                           | 15.1%                         | 17.3%                      | 0.01             |
| Model 3 (multivariable-adjusted <sup>2</sup> )                                           | 15.1%                         | 17.1%                      | 0.02             |
| Average moderate to severe hearing impairment (average hearing threshold more than 40dB) |                               |                            |                  |
| N                                                                                        | 8602                          | 2531                       |                  |
| Cases                                                                                    | 95                            | 50                         |                  |
| Prevalence (%)                                                                           |                               |                            |                  |
| Model 1 (age, sex-adjusted)                                                              | 1.2%                          | 1.6%                       | 0.11             |
| Model 2 (multivariable-adjusted <sup>1</sup> )                                           | 1.2%                          | 1.5%                       | 0.27             |
| Model 3 (multivariable-adjusted <sup>2</sup> )                                           | 1.3%                          | 1.5%                       | 0.44             |

<sup>1</sup> adjusted for age, sex, body mass index, current drinking (yes or no) and current smoking (yes or no)

<sup>2</sup> adjusted for factors in model 2 and diabetes mellitus (yes or no), hyperlipidemia (yes or no) and proteinuria (yes or no)

1  
2  
3  
4  
5  
6  
7  
8  
9  
10  
11  
12  
13  
14  
15  
16  
17  
18  
19  
20  
21  
22  
23  
24  
25  
26  
27  
28  
29  
30  
31  
32  
33  
34  
35  
36  
37  
38  
39  
40  
41

Participants at survey in 2010–2016  
(n=24, 823)

9, 857 subjects were excluded because they did not perceive hearing test between 2010–2016

Subjects perceive hearing test between 2010–2016  
(n=14, 966)

1, 425 subjects were excluded because they had missing data regarding body measurement, blood test results, and information about drinking/smoking status

66 subjects were excluded because they worked in noisy environments or were advised by a medical doctor to undergo a thorough examination

Analysis subjects (n=13, 475)

**STROBE 2007 (v4) Statement—Checklist of items that should be included in reports of *cross-sectional studies***

| Section/Topic                | Item # | Recommendation                                                                                                                                                                       | Reported on page #                         |
|------------------------------|--------|--------------------------------------------------------------------------------------------------------------------------------------------------------------------------------------|--------------------------------------------|
| <b>Title and abstract</b>    | 1      | (a) Indicate the study's design with a commonly used term in the title or the abstract                                                                                               | 1                                          |
|                              |        | (b) Provide in the abstract an informative and balanced summary of what was done and what was found                                                                                  | 2-3                                        |
| <b>Introduction</b>          |        |                                                                                                                                                                                      |                                            |
| Background/rationale         | 2      | Explain the scientific background and rationale for the investigation being reported                                                                                                 | 5                                          |
| Objectives                   | 3      | State specific objectives, including any prespecified hypotheses                                                                                                                     | 5-6                                        |
| <b>Methods</b>               |        |                                                                                                                                                                                      |                                            |
| Study design                 | 4      | Present key elements of study design early in the paper                                                                                                                              | 7                                          |
| Setting                      | 5      | Describe the setting, locations, and relevant dates, including periods of recruitment, exposure, follow-up, and data collection                                                      | 7-9                                        |
| Participants                 | 6      | (a) Give the eligibility criteria, and the sources and methods of selection of participants                                                                                          | 7                                          |
| Variables                    | 7      | Clearly define all outcomes, exposures, predictors, potential confounders, and effect modifiers. Give diagnostic criteria, if applicable                                             | 7-8                                        |
| Data sources/<br>measurement | 8*     | For each variable of interest, give sources of data and details of methods of assessment (measurement). Describe comparability of assessment methods if there is more than one group | 7-9                                        |
| Bias                         | 9      | Describe any efforts to address potential sources of bias                                                                                                                            | 14-15                                      |
| Study size                   | 10     | Explain how the study size was arrived at                                                                                                                                            | 7                                          |
| Quantitative variables       | 11     | Explain how quantitative variables were handled in the analyses. If applicable, describe which groupings were chosen and why                                                         | 8                                          |
| Statistical methods          | 12     | (a) Describe all statistical methods, including those used to control for confounding                                                                                                | 8-9                                        |
|                              |        | (b) Describe any methods used to examine subgroups and interactions                                                                                                                  | 9                                          |
|                              |        | (c) Explain how missing data were addressed                                                                                                                                          | 7 (we excluded subjects with missing data) |
|                              |        | (d) If applicable, describe analytical methods taking account of sampling strategy                                                                                                   | N/A                                        |



|                          |     |                                                                                                                                                                                                              |               |
|--------------------------|-----|--------------------------------------------------------------------------------------------------------------------------------------------------------------------------------------------------------------|---------------|
|                          |     | (e) Describe any sensitivity analyses                                                                                                                                                                        | N/A           |
| <b>Results</b>           |     |                                                                                                                                                                                                              |               |
| Participants             | 13* | (a) Report numbers of individuals at each stage of study—eg numbers potentially eligible, examined for eligibility, confirmed eligible, included in the study, completing follow-up, and analysed            | 7             |
|                          |     | (b) Give reasons for non-participation at each stage                                                                                                                                                         | 7             |
|                          |     | (c) Consider use of a flow diagram                                                                                                                                                                           | figure 1      |
| Descriptive data         | 14* | (a) Give characteristics of study participants (eg demographic, clinical, social) and information on exposures and potential confounders                                                                     | 10, table 1   |
|                          |     | (b) Indicate number of participants with missing data for each variable of interest                                                                                                                          | N/A           |
| Outcome data             | 15* | Report numbers of outcome events or summary measures                                                                                                                                                         | 10            |
| Main results             | 16  | (a) Give unadjusted estimates and, if applicable, confounder-adjusted estimates and their precision (eg, 95% confidence interval). Make clear which confounders were adjusted for and why they were included | table 2 and 3 |
|                          |     | (b) Report category boundaries when continuous variables were categorized                                                                                                                                    | N/A           |
|                          |     | (c) If relevant, consider translating estimates of relative risk into absolute risk for a meaningful time period                                                                                             | N/A           |
| Other analyses           | 17  | Report other analyses done—eg analyses of subgroups and interactions, and sensitivity analyses                                                                                                               | table 3       |
| <b>Discussion</b>        |     |                                                                                                                                                                                                              |               |
| Key results              | 18  | Summarise key results with reference to study objectives                                                                                                                                                     | 11            |
| Limitations              | 19  | Discuss limitations of the study, taking into account sources of potential bias or imprecision. Discuss both direction and magnitude of any potential bias                                                   | 13-14         |
| Interpretation           | 20  | Give a cautious overall interpretation of results considering objectives, limitations, multiplicity of analyses, results from similar studies, and other relevant evidence                                   | 12-14         |
| Generalisability         | 21  | Discuss the generalisability (external validity) of the study results                                                                                                                                        | 13-14         |
| <b>Other information</b> |     |                                                                                                                                                                                                              |               |
| Funding                  | 22  | Give the source of funding and the role of the funders for the present study and, if applicable, for the original study on which the present article is based                                                | 15            |

\*Give information separately for cases and controls in case-control studies and, if applicable, for exposed and unexposed groups in cohort and cross-sectional studies.

**Note:** An Explanation and Elaboration article discusses each checklist item and gives methodological background and published examples of transparent reporting. The STROBE checklist is best used in conjunction with this article (freely available on the Web sites of PLoS Medicine at <http://www.plosmedicine.org/>, Annals of Internal Medicine at <http://www.annals.org/>, and Epidemiology at <http://www.epidem.com/>). Information on the STROBE Initiative is available at [www.strobe-statement.org](http://www.strobe-statement.org).

# BMJ Open

## Association between hypertension and hearing impairment in health check-ups among Japanese workers: a cross-sectional study

|                                 |                                                                                                                                                                                                                                                                                                                                                                                      |
|---------------------------------|--------------------------------------------------------------------------------------------------------------------------------------------------------------------------------------------------------------------------------------------------------------------------------------------------------------------------------------------------------------------------------------|
| Journal:                        | <i>BMJ Open</i>                                                                                                                                                                                                                                                                                                                                                                      |
| Manuscript ID                   | bmjopen-2018-028392.R1                                                                                                                                                                                                                                                                                                                                                               |
| Article Type:                   | Research                                                                                                                                                                                                                                                                                                                                                                             |
| Date Submitted by the Author:   | 12-Feb-2019                                                                                                                                                                                                                                                                                                                                                                          |
| Complete List of Authors:       | Umehara, Mitsumasa; Dokkyo Medical University, Public Health Sairenchi, Toshimi ; Dokkyo Medical University School of Medicine, Department of Public Health; Haruyama, Yasuo; Dokkyo Medical University, Department of Public Health<br>Nagao, Masanori; Dokkyo Medical University, Public Health Kobashi, Gen; Dokkyo Medical University School of Medicine, Dept. of Public Health |
| <b>Primary Subject Heading</b>: | Epidemiology                                                                                                                                                                                                                                                                                                                                                                         |
| Secondary Subject Heading:      | Public health                                                                                                                                                                                                                                                                                                                                                                        |
| Keywords:                       | Epidemiology < TROPICAL MEDICINE, cross-sectional study, Hypertension < CARDIOLOGY, hearing impairment                                                                                                                                                                                                                                                                               |
|                                 |                                                                                                                                                                                                                                                                                                                                                                                      |

SCHOLARONE™  
Manuscripts

1  
2  
3  
4  
5 **Association between hypertension and hearing impairment in health check-ups**  
6  
7  
8 **among Japanese workers: a cross-sectional study**  
9

10  
11  
12 Mitsumasa Umesawa, MD, PhD<sup>1</sup>, Toshimi Sairenchi, PhD<sup>1</sup>, Yasuo Haruyama, MD,  
13  
14 PhD<sup>1</sup>, Masanori Nagao, PhD<sup>1</sup>, Gen Kobashi, MD, PhD<sup>1</sup>  
15  
16

17  
18  
19 <sup>1</sup> Department of Public Health, Dokkyo Medical University  
20  
21  
22  
23  
24  
25

26 **Corresponding author**  
27

28 Mitsumasa Umesawa  
29

30  
31 Department of Public Health, Dokkyo Medical University, Mibu 321-0293, Japan  
32

33 Tel.: +81-282-87-2133  
34

35 Fax: +81-282-86-2935  
36

37 Email: umesawa@dokkyomed.ac.jp  
38  
39  
40  
41

42 Word count: 2699 words  
43  
44  
45  
46  
47  
48  
49  
50  
51  
52  
53  
54  
55  
56  
57  
58  
59  
60

## Abstract

**Objectives:** Prevention of hearing impairment (HI) is important because recovery of hearing is typically difficult. Epidemiological studies have examined the risk factors for HI. However, the association between hypertension and HI remains unclear. We aimed to clarify the association between hypertension and HI.

**Design:** Cross-sectional study.

**Setting:** Japanese workers in an information and communication technologies company.

**Participants:** Of 24,823 employees of the same company, we recruited 13,475 participants who underwent hearing testing by audiometry in annual health checkups and did not have missing data regarding body measurement, blood test results, and drinking/smoking status (mean age: 49.4 years; males: 86.4%).

**Primary outcomes:** Hearing tests were performed at two frequencies (1 kHz, 4 kHz). We defined the inability of participants to respond to 30 dB at 1 kHz and/or 40 dB at 4 kHz as overall moderate HI. We also defined moderate HI at 1 kHz or 4 kHz as an abnormal finding at 1 kHz or 4 kHz. We defined hypertension as  $\geq 140$  mmHg systolic blood pressure and/or  $\geq 90$  mmHg diastolic blood pressure and/or taking medication for hypertension. We examined the association between hypertension and HI after adjusting for age, sex, body mass index, smoking/drinking status, diabetes mellitus, hyperlipidemia and proteinuria.

**Results:** Moderate HI was identified in 980 participants (7.3%). Of these, 441 participants (3.3%) exhibited moderate HI at 1 kHz, and 787 participants (5.8%) exhibited moderate HI at 4 kHz. Subjects with hypertension showed a higher prevalence of any hearing impairment. The prevalence of overall moderate HI, moderate HI at 1

1  
2  
3  
4  
5 kHz and moderate HI at 4 kHz among subjects with hypertension was 8.7%, 4.3% and  
6  
7 6.8%, while those among subjects without hypertension was 6.9%, 3.0% and 5.6% ( $P <$   
8  
9 0.01,  $P < 0.01$  and  $P = 0.01$ , respectively).  
10  
11

12 **Conclusions:** Hypertension was associated with moderate HI in Japanese workers.

13  
14 (299/300 words)  
15  
16  
17  
18  
19  
20  
21  
22  
23  
24  
25  
26  
27  
28  
29  
30  
31  
32  
33  
34  
35  
36  
37  
38  
39  
40  
41  
42  
43  
44  
45  
46  
47  
48  
49  
50  
51  
52  
53  
54  
55  
56  
57  
58  
59  
60

For peer review only

### Strength and limitations of this study

- The association between hypertension and hearing impairment has been examined in several previous epidemiological studies, with inconsistent results.
- This study was based on annual health check-ups which were conducted according to Japanese law; therefore, study participants comprised both healthy and unhealthy individuals.
- Our research was unable to use precise information on hearing tests compared with tests conducted in hospitals because this study is based on health check-ups that are mandated by law.

## Introduction

Hearing impairment (HI) is a common condition among older people. The Global Burden of Disease Study estimated that HI is one of eight chronic diseases and injuries affecting more than 10% of the world's population[1]. According to the World Health Organization (WHO) fact sheet published in March 2018, almost one-third of people aged 65 years or older have HI[2].

Prevention of HI is an important public health issue not only because HI makes communication difficult, but also because it is associated with death, depression and dementia[3-7]. A recent review reported that HI in midlife (45–65 years old) is associated with the risk of dementia in future[8].

Recovery from HI is typically difficult, and several epidemiological studies have been conducted in an attempt to identify the risk factors for HI. Many risk factors for HI have been identified, including aging, exposure to loud noise, and medication. Of these, many previous studies have examined the associations between cardiovascular risk factors and HI. A meta-analysis of 13 cross-sectional studies revealed that, compared with persons without a diabetic condition, a higher prevalence of HI was observed in persons with diabetes mellitus[9]. For serum lipids, compared with male participants who had a lower high-density lipoprotein (HDL) cholesterol concentration, hearing levels at high frequencies were significantly better among male participants with a higher HDL cholesterol concentration[10]. A recent study in Australia reported that current smoking, obesity, high serum triglycerides and brachial-ankle pulse wave velocity were positively associated with hearing loss in addition to diabetic condition and serum HDL cholesterol levels[11]. Regarding hypertension, several epidemiological studies examined the association between hypertension and HI.

1  
2  
3  
4  
5  
6  
7  
8  
9  
10  
11  
12  
13  
14  
15  
16  
17  
18  
19  
20  
21  
22  
23  
24  
25  
26  
27  
28  
29  
30  
31  
32  
33  
34  
35  
36  
37  
38  
39  
40  
41  
42  
43  
44  
45  
46  
47  
48  
49  
50  
51  
52  
53  
54  
55  
56  
57  
58  
59  
60

However, the results of these studies were inconsistent[11-16]. Cross-sectional studies reported a positive association between hypertension and HI in Korea and in Indian workers in the iron and steel industries[12, 13]. The same association was observed in a case-control study in Brazil, which also reported a positive association between hypertension and hearing loss[14]. A preliminary study in Mexico reported that hypertensive participants exhibited HI in relation to an 8 kHz pure tone sound, compared with participants without hypertension[15]. The Australian study mentioned above also reported that systolic and diastolic blood pressure level were positively associated with hearing thresholds of the best ear, especially for low frequency sounds[11]. However, a cross-sectional study of Hispanic/Latino participants in the United States found no such association[16].

Therefore, we aimed to examine the association between hypertension and HI in Japan. The prevalence of high blood pressure in Japan is equal to or higher than that in the UK and the United States[17]. If hypertension is positively associated with HI, early intervention for hypertension may be beneficial for preventing HI. We hypothesized that hypertension would be positively associated with HI. To test this hypothesis, we conducted an association study among Japanese workers.



## Methods

### *Participants*

Participants were 18-to-81-year-old employees of Fujitsu Limited, an information and communication technologies company. We recruited a total of 24,823 participants (20,732 men and 4,091 women) who underwent annual health check-ups between 2010 and 2016. For participants who had undergone annual health check-ups twice or more, we analyzed the most recent data. We excluded 9,857 participants who did not undergo hearing tests using audiometry from the analysis. In addition, we excluded 1,425 participants who had missing data regarding body measurement, blood test results, and information about drinking/smoking status. We also excluded 66 participants who worked in noisy environments or who were advised by a medical doctor to undergo a thorough examination, because they were presumed to be likely to exhibit a higher prevalence of HI. Consequently, we included data from 13,475 participants (11,636 males and 1,839 females) in the final analyses. (Figure 1)

We used anonymized data with the permission of Fujitsu Limited.

### *Risk factor survey*

The annual health check-up was conducted as required by the Industrial Safety and Health Act under Japanese law. The check-up consisted of body height and weight measurement with light clothing, ascertaining medical history including hypertension, diabetes mellitus, serum lipid abnormality, high serum uric acid and liver dysfunction, drinking/smoking status, a hearing test, a vision test, blood pressure measurement, blood test including serum lipids, hepatic enzymes, serum glucose, hemoglobin A1c, uric acid and blood count, and the dipstick urine test. Family history of illness such as

1  
2  
3  
4  
5 cancer, stroke, coronary heart disease, hypertension and diabetes mellitus was  
6  
7  
8 ascertained. Participants had their blood pressure levels measured by automated  
9  
10 sphygmomanometers on the arm. If the blood pressure level was high, the measurement  
11  
12 was repeated. The hearing test was performed using audiometry. In accordance with  
13  
14 Japanese law, two categories of hearing tests were applied at 1 kHz and 4 kHz for each  
15  
16 ear. Inability to respond to 30 dB at 1 kHz and/or 40 dB at 4 kHz was defined as the  
17  
18 threshold for “abnormal”. In addition, 11,709 of 13,475 participants tested their hearing  
19  
20 thresholds every 5 dB between -10 dB and 90 dB in 1 kHz and 4 kHz. We calculated  
21  
22 the mean hearing threshold as a mean of 1 kHz and 4 kHz in both ears. For HbA1c, the  
23  
24 National Glycohemoglobin Standardization Program (NGSP) value was used.  
25  
26  
27  
28  
29  
30

### 31 *Definition of variables*

32  
33 We defined hypertension as  $\geq 140$  mmHg systolic blood pressure and/or  $\geq 90$  mmHg  
34  
35 diastolic blood pressure and/or taking medication for hypertension. For HI, we defined a  
36  
37 participant as having overall moderate HI (overall moderate HI), if there was an abnormal  
38  
39 finding in any one category. Likewise, we defined moderate HI at 1 kHz (4 kHz) as an  
40  
41 abnormal finding at 1 kHz (4 kHz). Also, we defined mean mild HI as a mean hearing  
42  
43 threshold of  $>25$  dB and  $\leq 40$  dB, and defined mean moderate to severe HI as a mean  
44  
45 hearing threshold more than 40 dB[18]. For other variables, we defined diabetes mellitus  
46  
47 as  $\geq 6.5\%$  HbA1c and/or taking medication for diabetes mellitus, high serum cholesterol  
48  
49 level as  $\geq 220$  mg/dl and/or taking medication for hypercholesterolemia, and proteinuria  
50  
51 as dipstick proteinuria 1+ or more in a urine test. Body mass index (BMI) values were  
52  
53  
54  
55  
56 calculated as follows: weight in kilograms divided by height in meters squared.  
57  
58  
59  
60

### *Statistical analysis*

We calculated the characteristics of participants according to the presence of hypertension. The characteristics included variables as age, sex, BMI, systolic and diastolic blood pressure, blood test, dipstick proteinuria, current smoking, current drinking, and medication for hypertension, hypercholesterolemia, and diabetes mellitus. Blood test included HbA1c level and serum lipid level. We calculated age and sex-adjusted prevalence of overall moderate HI and moderate HI at 1 kHz and 4 kHz according to the presence of hypertension (model 1). In addition, we calculated the multivariable-adjusted prevalence of HI. We used confounding variables for adjustment, including age, sex, BMI (kg/m<sup>2</sup>), current drinker (yes or no), current smoker (yes or no), diabetes mellitus (yes or no), hypercholesterolemia (yes or no) and proteinuria (yes or no) (model 2). We also examined the association between hypertension and mean mild or moderate to severe HI. We tested for sex interaction in each analysis and found no significant interactions.

We used SAS version 9.4 software (SAS Institute, Cary, NC) for all analyses.

*P*-values <0.05 were regarded as statistically significant.

### *Patient and public involvement*

The study protocol of the present study was approved by the Ethics Committee of Dokkyo Medical University (Univ-28018). This committee involved community views.

Patients were not involved in the design or planning of the study.

## Results

Among 13,475 participants in the current study, 980 (7.3%) exhibited overall moderate HI. A total of 441 participants (3.3%) exhibited moderate HI at 1 kHz, and 787 participants (5.8%) exhibited moderate HI at 4 kHz. A total of 248 participants (1.8%) exhibited HI at both 1 kHz and 4 kHz. Among 11,709 participants in which the mean hearing threshold was calculated, 862 participants (7.4%) exhibited mean mild HI and 153 participants (1.3%) exhibited mean moderate to severe HI.

Table 1 shows the characteristics of participants according to the presence of hypertension. Compared with participants who did not have hypertension, participants with hypertension were older, with higher BMI values, higher blood pressure levels, and higher HbA1c levels. In addition, hypertensive participants were more likely to be male, more likely to take medication for diabetes mellitus and hypercholesterolemia, and less likely to have proteinuria.

Table 2 shows the prevalence of moderate HI according to the presence of hypertension. Compared with participants who did not have hypertension, participants with hypertension showed a higher prevalence of overall moderate HI and its subtypes. The prevalence of overall moderate HI among hypertensive participants was 8.7%, while that among participants who did not have hypertension was 6.9% ( $P$ -values for difference  $< 0.01$ ). The prevalence rates of moderate HI at 1 kHz and 4 kHz among hypertensive participants were 4.3% and 6.8%, respectively, while those among participants who did not have hypertension were 3.0% and 5.6% ( $P$ -values for differences were  $< 0.01$  and  $0.01$ ).

Table 3 shows the associations between hypertension and severity of HI, as mean mild HI and mean moderate to severe HI, among participants for whom the mean

1  
2  
3  
4  
5 hearing threshold was calculated. After adjustment for confounding variables, the  
6 prevalence rates of mean mild HI and mean moderate to severe HI were 8.7% and 1.5%  
7  
8 among participants with hypertension, while the prevalence rates were 6.9% and 1.3%  
9  
10 among participants without hypertension (*P*-values for difference were <0.01 and 0.50).  
11  
12 In addition, we examined the association between severity of hypertension and severity  
13  
14 of HI. However, there was no significant association between them.  
15  
16  
17  
18

19 We also examined the association between hypertension and HI according to the  
20 number of ears with overall moderate HI. Participants with hypertension showed  
21 significantly higher prevalence of bilateral overall moderate HI, but not unilateral  
22 overall moderate HI, compared with participants without hypertension. The prevalence  
23 rates of bilateral overall moderate HI were 3.2% for hypertensive participants and 2.2%  
24 for non-hypertensive participants (*P*-value for the difference was <0.01), while those for  
25 unilateral overall moderate HI were 5.5% and 4.7%, respectively (*P*-value for difference  
26 = 0.09).  
27  
28  
29  
30  
31  
32  
33  
34  
35  
36  
37  
38  
39  
40  
41  
42  
43  
44  
45  
46  
47  
48  
49  
50  
51  
52  
53  
54  
55  
56  
57  
58  
59  
60

## Discussion

The current study revealed that participants with hypertension exhibited significantly higher prevalence of HI in all ranges, at both 1 kHz and 4 kHz, compared with participants without hypertension. In addition, participants with hypertension exhibited a higher prevalence of mean mild HI compared with participants without hypertension. However, no association was found between hypertension and mean moderate to severe HI.

A previous cross-sectional study in Korea revealed that hypertension was positively associated with the prevalence of HI[12]. Compared with participants without hypertension, odds ratios (ORs) and 95% confidence intervals (95% CIs) of participants with hypertension were 1.24 (1.10–1.42) for low/mid frequency mild HI, defined as an unaided pure tone hearing level for the superior ear of 26 to 40 dB in 0.5, 1.0 and 2.0 kHz conditions, and 1.29 (1.16–1.45) for high frequency mild HI, defined in the same way in the 3.0, 4.0 and 6.0 kHz conditions. In addition, a previous study in Korea reported that ORs and 95% CIs of participants with hypertension were 1.19 (1.02–1.39) for low/mid frequency moderate-to-profound HI defined as an unaided pure tone hearing level for the superior ear of 41 dB or more in 0.5, 1.0 and 2.0 kHz conditions, and 1.20 (1.07–1.35) for high frequency moderate-to-profound HI, defined in the same way in 3.0, 4.0 and 6.0 kHz conditions. In the present study, the results revealed that participants with hypertension had a higher prevalence of HI for both 1 kHz and 4 kHz stimuli. We found a positive association between hypertension and the prevalence of mild HI. However, the association between hypertension and the prevalence of moderate to severe HI was not significant. We speculate that the smaller number of cases of moderate to severe HI, based on the lower proportion of older subjects, was

1  
2  
3  
4  
5 likely to have caused the difference between the present study and the previous study in  
6  
7 Korea. A cross-sectional study of Hispanic/Latino participants in the United States  
8 reported that the association between hypertension and total HI was not significant,  
9  
10 whereas the association between hypertension and bilateral HI was significant[16]. In  
11  
12 the present study, participants with hypertension showed significantly higher prevalence  
13  
14 of bilateral HI, but not unilateral HI.  
15  
16  
17  
18

19  
20 Consideration of the difference between low frequency and high frequency HI  
21  
22 in the current findings may be valuable. The present study and the previous study in  
23  
24 Korea indicated that subjects with hypertension had higher prevalence of both lower and  
25  
26 higher frequency HI, compared with subjects without hypertension[12]. However, the  
27  
28 study in Mexico reported an association between hypertension and higher hearing  
29  
30 thresholds in 8 kHz, but not for lower frequencies[15]. The study in Australia reported  
31  
32 an association between hypertension and the best ear low-frequency average, but not the  
33  
34 high-frequency average[11]. Although the number of previous studies is limited, it is  
35  
36 possible that a clear relationship between hypertension and HI exists in Asian  
37  
38  
39  
40  
41 populations.

42  
43 The recent cross-sectional study in Australia revealed that Framingham risk  
44  
45 scores were positively associated with both best ear low-frequency average and high-  
46  
47 frequency average values[11]. We also examined the association between Framingham  
48  
49 risk score and prevalence of HI, and found that prevalence of total HI, HI in 1 kHz, HI  
50  
51 in 4 kHz, mean mild HI and mean moderate to severe HI was significantly higher in the  
52  
53 high-scoring group (5 or more points) compared with the low-scoring group (-15 to 1  
54  
55 point) (data not shown).  
56  
57

58  
59 The mechanism underlying the association between hypertension and HI is  
60

1  
2  
3  
4  
5 uncertain, but our findings and those of previous studies imply that micro-vessel  
6 damage may lead to HI. Hypertension is one of the major risk factors of peripheral  
7 arterial disease[19-22]. The inner ear depends on the supply of oxygen and nutrition in  
8 the labyrinthine artery. This artery is a thin branch of the anterior inferior cerebellar  
9 artery. Therefore, micro-vessel atherosclerosis caused by hypertension may be  
10 associated with a reduction in the level of oxygen and the nutrition supply for the inner  
11 ear. In a previous study using an animal model, organ blood flow was found to be lower  
12 in spontaneously hypertensive rats compared with normotensive rats [23]. In addition,  
13 hypertension may be associated with brain damage. In the present study, the effect of  
14 hypertension on HI was clear for bilateral HI. We assumed that hypertension may  
15 damage not only the inner ear but also the primary auditory cortex.  
16  
17  
18  
19  
20  
21  
22  
23  
24  
25  
26  
27  
28  
29

30 The present study had several limitations that should be considered. First, the  
31 cross-sectional design of the present study did not allow us to establish a causal  
32 relationship. Second, we were unable to evaluate the association between hypertension  
33 and hearing thresholds other than 1 kHz and 4 kHz, because this study was based on  
34 annual health check-ups, whose items were prescribed by Japanese law. In addition, we  
35 were unable to conduct a survey with unified measurement protocols, including the type  
36 of audiometer and automated sphygmomanometer, because the surveys were conducted  
37 in multiple centers over several years and the accuracy management of survey is left to  
38 each health check-up agency in Japan. Moreover, we were unable to evaluate the impact  
39 of family history of HI, because it was not included in the survey. Third, we were  
40 unable to evaluate the precise history of noise exposure because the data were  
41 anonymous and did not contain a precise history of noise exposure before 2010.  
42  
43  
44  
45  
46  
47  
48  
49  
50  
51  
52  
53  
54  
55  
56  
57  
58  
59  
60

Therefore, the present study design did not enable us to comprehensively evaluate the



1  
2  
3  
4  
5 effects of noise exposure. In addition, we were unable to adjust for work-related factors  
6  
7 because of anonymity. Finally, because the current study was based on the results of  
8  
9 annual health check-ups in a single company which mainly consisted of male staff, the  
10  
11 generalizability of the current findings is unclear.  
12  
13

14  
15 In conclusion, the current findings revealed that hypertension was positively  
16  
17 associated with the prevalence of HI in Japanese workers. The association was evident  
18  
19 for mild HI and bilateral HI. Further studies will be necessary to confirm this finding.  
20  
21  
22  
23  
24  
25  
26  
27  
28  
29  
30  
31  
32  
33  
34  
35  
36  
37  
38  
39  
40  
41  
42  
43  
44  
45  
46  
47  
48  
49  
50  
51  
52  
53  
54  
55  
56  
57  
58  
59  
60

## Acknowledgments

We thank Benjamin Knight, MSc., from Edanz Group ([www.edanzediting.com/ac](http://www.edanzediting.com/ac)) for editing a draft of this manuscript.

## Funding

This work was supported by JSPS Grant Number JP17K18051.

## Contributors

MU and GK designed this study. MU and GK obtained the data set. MU, TS, YH, MN and GK analyzed the data. MU wrote the first draft of the manuscript. TS, YH, MN and GK commented on the manuscript.

## Competing interests

None declared.

## Data sharing statement

No additional data are available.

1  
2  
3  
4  
5  
6  
7  
8  
9  
10  
11  
12  
13  
14  
15  
16  
17  
18  
19  
20  
21  
22  
23  
24  
25  
26  
27  
28  
29  
30  
31  
32  
33  
34  
35  
36  
37  
38  
39  
40  
41  
42  
43  
44  
45  
46  
47  
48  
49  
50  
51  
52  
53  
54  
55  
56  
57  
58  
59  
60

**Figure Legends**

Figure 1. Study subjects.

For peer review only

## References

1. GBD 2015 Disease and Injury Incidence and Prevalence Collaborators. Global, regional, and national incidence, prevalence, and years lived with disability for 310 diseases and injuries, 1990-2015: a systematic analysis for the Global Burden of Disease Study 2015. *Lancet*. 2016;388:1545-602.
2. WHO. Fact sheets (15 March 2018), Deafness and hearing loss. <https://www.who.int/news-room/fact-sheets/detail/deafness-and-hearing-loss> (accessed 26 Jan 2019).
3. Lin FR, Metter EJ, O'Brien RJ, et al. Hearing loss and incident dementia. *Arch Neurol*. 2011;68:214-20.
4. Davies HR, Cadar D, Herbert A, et al. Hearing Impairment and Incident Dementia: Findings from the English Longitudinal Study of Ageing. *J Am Geriatr Soc*. 2017;65:2074-81.
5. Deal JA, Betz J, Yaffe K, et al. Hearing Impairment and Incident Dementia and Cognitive Decline in Older Adults: The Health ABC Study. *J Gerontol A Biol Sci Med Sci*. 2017;72:703-9.
6. Contrera KJ, Betz J, Genther DJ, et al. Association of Hearing Impairment and Mortality in the National Health and Nutrition Examination Survey. *JAMA Otolaryngol Head Neck Surg*. 2015;141:944-6.
7. Li CM, Zhang X, Hoffman HJ, et al. Hearing impairment associated with depression in US adults, National Health and Nutrition Examination Survey 2005-2010. *JAMA Otolaryngol Head Neck Surg*. 2014;140:293-302.
8. Livingston G, Sommerlad A, Orgeta V, et al. Dementia prevention, intervention, and care. *Lancet*. 2017;390:2673-734

- 1  
2  
3  
4  
5  
6  
7  
8  
9  
10  
11  
12  
13  
14  
15  
16  
17  
18  
19  
20  
21  
22  
23  
24  
25  
26  
27  
28  
29  
30  
31  
32  
33  
34  
35  
36  
37  
38  
39  
40  
41  
42  
43  
44  
45  
46  
47  
48  
49  
50  
51  
52  
53  
54  
55  
56  
57  
58  
59  
60
9. Horikawa C, Kodama S, Tanaka S, et al. Diabetes and risk of hearing impairment in adults: a meta-analysis. *J Clin Endocrinol Metab.* 2013;98:51-8.
10. Suzuki K, Kaneko M, Murai K. Influence of serum lipids on auditory function. *Laryngoscope.* 2000;110:1736-8.
11. Tan HE, Lan NSR, Knuiman MW, et al. Associations between cardiovascular disease and its risk factors with hearing loss-A cross-sectional analysis. *Clin Otolaryngol.* 2018;43:172-81.
12. Hong JW, Jeon JH, Ku CR, et al. The prevalence and factors associated with hearing impairment in the Korean adults: the 2010-2012 Korea National Health and Nutrition Examination Survey (observational study). *Medicine (Baltimore).* 2015;94:e611.
13. Narlawar UW, Surjuse BG, Thakre SS. Hypertension and hearing impairment in workers of iron and steel industry. *Indian J Physiol Pharmacol.* 2006;50:60-6.
14. de Moraes Marchiori LL, de Almeida Rego Filho E, Matsuo T. Hypertension as a factor associated with hearing loss. *Braz J Otorhinolaryngol.* 2006;72:533-40.
15. Esparza CM, Jáuregui-Renaud K, Morelos CM, et al. Systemic high blood pressure and inner ear dysfunction: a preliminary study. *Clin Otolaryngol.* 2007;32:173-8.
16. Cruickshanks KJ, Dhar S, Dinces E, et al. Hearing Impairment Prevalence and Associated Risk Factors in the Hispanic Community Health Study/Study of Latinos. *JAMA Otolaryngol Head Neck Surg.* 2015;141:641-8.
17. Mills KT, Bundy JD, Kelly TN, et al. Global Disparities of Hypertension Prevalence and Control: A Systematic Analysis of Population-Based Studies From 90 Countries. *Circulation.* 2016;134:441-50.
18. Alford RL, Arnos KS, Fox M, et al. American College of Medical Genetics and

1  
2  
3  
4  
5 Genomics guideline for the clinical evaluation and etiologic diagnosis of hearing  
6 loss. *Genet Med.* 2014;16:347-55.  
7  
8

- 9  
10 19. Kitamura A, Iso H, Imano H, et al. Prevalence and correlates of carotid  
11 atherosclerosis among elderly Japanese men. *Atherosclerosis.* 2004;172:353-9.  
12  
13 20. Matsunaga M, Yatsuya H, Iso H, et al. Similarities and differences between  
14 coronary heart disease and stroke in the associations with cardiovascular risk  
15 factors: The Japan Collaborative Cohort Study. *Atherosclerosis.* 2017;261:124-30.  
16  
17 21. Emdin CA, Anderson SG, Callender T, et al. Usual blood pressure, peripheral  
18 arterial disease, and vascular risk: cohort study of 4.2 million adults. *BMJ.*  
19 2015;351:h4865.  
20  
21 22. Matsunaga M, Yatsuya H, Iso H, et al. Similarities and differences between  
22 coronary heart disease and stroke in the associations with cardiovascular risk  
23 factors: The Japan Collaborative Cohort Study. *Atherosclerosis.* 2017;261:124-30.  
24  
25 23. Sugiyama M, Ohashi K, Sasaki T, et al. The effect of blood pressure on inner ear  
26 blood flow. *Arch Otorhinolaryngol.* 1984;239:197-203.  
27  
28  
29  
30  
31  
32  
33  
34  
35  
36  
37  
38  
39  
40  
41  
42  
43  
44  
45  
46  
47  
48  
49  
50  
51  
52  
53  
54  
55  
56  
57  
58  
59  
60

Table 1 Characteristics of subjects according to hypertension status

|                                                     | Subjects without hypertension |   |     | Subjects with hypertension |   |     | P for difference |
|-----------------------------------------------------|-------------------------------|---|-----|----------------------------|---|-----|------------------|
| N                                                   | 10437                         |   |     | 3038                       |   |     |                  |
| Age (years) <sup>1</sup>                            | 48.7                          | ± | 5.6 | 51.6                       | ± | 5.1 | <0.01            |
| Men (%)                                             | 84.2                          |   |     | 93.7                       |   |     | <0.01            |
| Body mass index (kg/m <sup>2</sup> ) <sup>2,3</sup> | 23.2                          | ± | 0.0 | 25.7                       | ± | 0.1 | <0.01            |
| Systolic blood pressure (mmHg) <sup>2,3</sup>       | 115.8                         | ± | 0.1 | 132.0                      | ± | 0.2 | <0.01            |
| Diastolic blood pressure (mmHg) <sup>2,3</sup>      | 72.2                          | ± | 0.1 | 85.5                       | ± | 0.2 | <0.01            |
| Medication for hypertension (%)                     | -                             |   |     | 63.4                       |   |     | -                |
| HbA1c (%) <sup>2,3</sup>                            | 5.6                           | ± | 0.0 | 5.8                        | ± | 0.0 | <0.01            |
| Medication for diabetes mellitus (%) <sup>2</sup>   | 3.0                           |   |     | 10.4                       |   |     | <0.01            |
| Total Cholesterol (mg/dl) <sup>2,3</sup>            | 207.0                         | ± | 0.3 | 205.4                      | ± | 0.6 | 0.03             |
| Triglyceride (mg/dl) <sup>2,3</sup>                 | 115.9                         | ± | 1.1 | 146.7                      | ± | 2.1 | <0.01            |
| Medication for dislipidemia (%) <sup>2</sup>        | 7.3                           |   |     | 18.8                       |   |     | <0.01            |
| Proteinuria (%) <sup>2</sup>                        | 3.6                           |   |     | 2.7                        |   |     | 0.02             |
| Current drinker (%) <sup>2</sup>                    | 74.9                          |   |     | 78.3                       |   |     | <0.01            |
| Current smoker (%) <sup>2</sup>                     | 22.0                          |   |     | 20.3                       |   |     | 0.06             |
| Total hearing impairment (%)                        | 6.2                           |   |     | 10.9                       |   |     | <0.01            |
| Hearing impairment in 1 kHz (%)                     | 2.7                           |   |     | 5.2                        |   |     | <0.01            |
| Hearing impairment in 4 kHz (%)                     | 5.0                           |   |     | 8.7                        |   |     | <0.01            |

<sup>1</sup> means ± standard deviation

<sup>2</sup> age, sex-adjusted

<sup>3</sup> means ± standard error

Table 2 Relationships between hypertension and hearing impairment

|                                                | Subjects without hypertension | Subjects with hypertension | P for difference |
|------------------------------------------------|-------------------------------|----------------------------|------------------|
| Total hearing impairment                       |                               |                            |                  |
| N                                              | 10437                         | 3038                       |                  |
| Cases                                          | 650                           | 330                        |                  |
| Prevalence (%)                                 |                               |                            |                  |
| Model 1 (age, sex-adjusted)                    | 6.8%                          | 9.0%                       | <0.01            |
| Model 2 (multivariable-adjusted <sup>1</sup> ) | 6.9%                          | 8.7%                       | <0.01            |
| Hearing impairment in 1 kHz                    |                               |                            |                  |
| N                                              | 10437                         | 3038                       |                  |
| Cases                                          | 284                           | 157                        |                  |
| Prevalence (%)                                 |                               |                            |                  |
| Model 1 (age, sex-adjusted)                    | 2.9%                          | 4.5%                       | <0.01            |
| Model 2 (multivariable-adjusted <sup>1</sup> ) | 3.0%                          | 4.3%                       | <0.01            |
| Hearing impairment in 4 kHz                    |                               |                            |                  |
| N                                              | 10437                         | 3038                       |                  |
| Cases                                          | 524                           | 263                        |                  |
| Prevalence (%)                                 |                               |                            |                  |
| Model 1 (age, sex-adjusted)                    | 5.5%                          | 7.1%                       | <0.01            |
| Model 2 (multivariable-adjusted <sup>1</sup> ) | 5.6%                          | 6.8%                       | 0.01             |

<sup>1</sup> adjusted for age, sex, body mass index, current drinking (yes or no), current smoking (yes or no), diabetes mellitus (yes or no), hyperlipidemia (yes or no) and proteinuria (yes or no)



Table 3 Relationships between hypertension and hearing impairment according to mean values

|                                                                                    | Subjects without hypertension | Subjects with hypertension | P for difference |
|------------------------------------------------------------------------------------|-------------------------------|----------------------------|------------------|
| Mean mild hearing impairment (mean hearing threshold >20dB and <=40dB)             |                               |                            |                  |
| N                                                                                  | 8602                          | 2531                       |                  |
| Cases                                                                              | 1186                          | 548                        |                  |
| Prevalence (%)                                                                     |                               |                            |                  |
| Model 1 (age, sex-adjusted)                                                        | 14.8%                         | 18.2%                      | <0.01            |
| Model 2 (multivariable-adjusted <sup>1</sup> )                                     | 15.1%                         | 17.1%                      | 0.02             |
| Mean moderate to severe hearing impairment (mean hearing threshold more than 40dB) |                               |                            |                  |
| N                                                                                  | 8602                          | 2531                       |                  |
| Cases                                                                              | 95                            | 50                         |                  |
| Prevalence (%)                                                                     |                               |                            |                  |
| Model 1 (age, sex-adjusted)                                                        | 1.2%                          | 1.6%                       | 0.11             |
| Model 2 (multivariable-adjusted <sup>1</sup> )                                     | 1.3%                          | 1.5%                       | 0.44             |

<sup>1</sup> adjusted for age, sex, body mass index, current drinking (yes or no) , current smoking (yes or no), diabetes mellitus (yes or no), hyperlipidemia (yes or no) and proteinuria (yes or no)

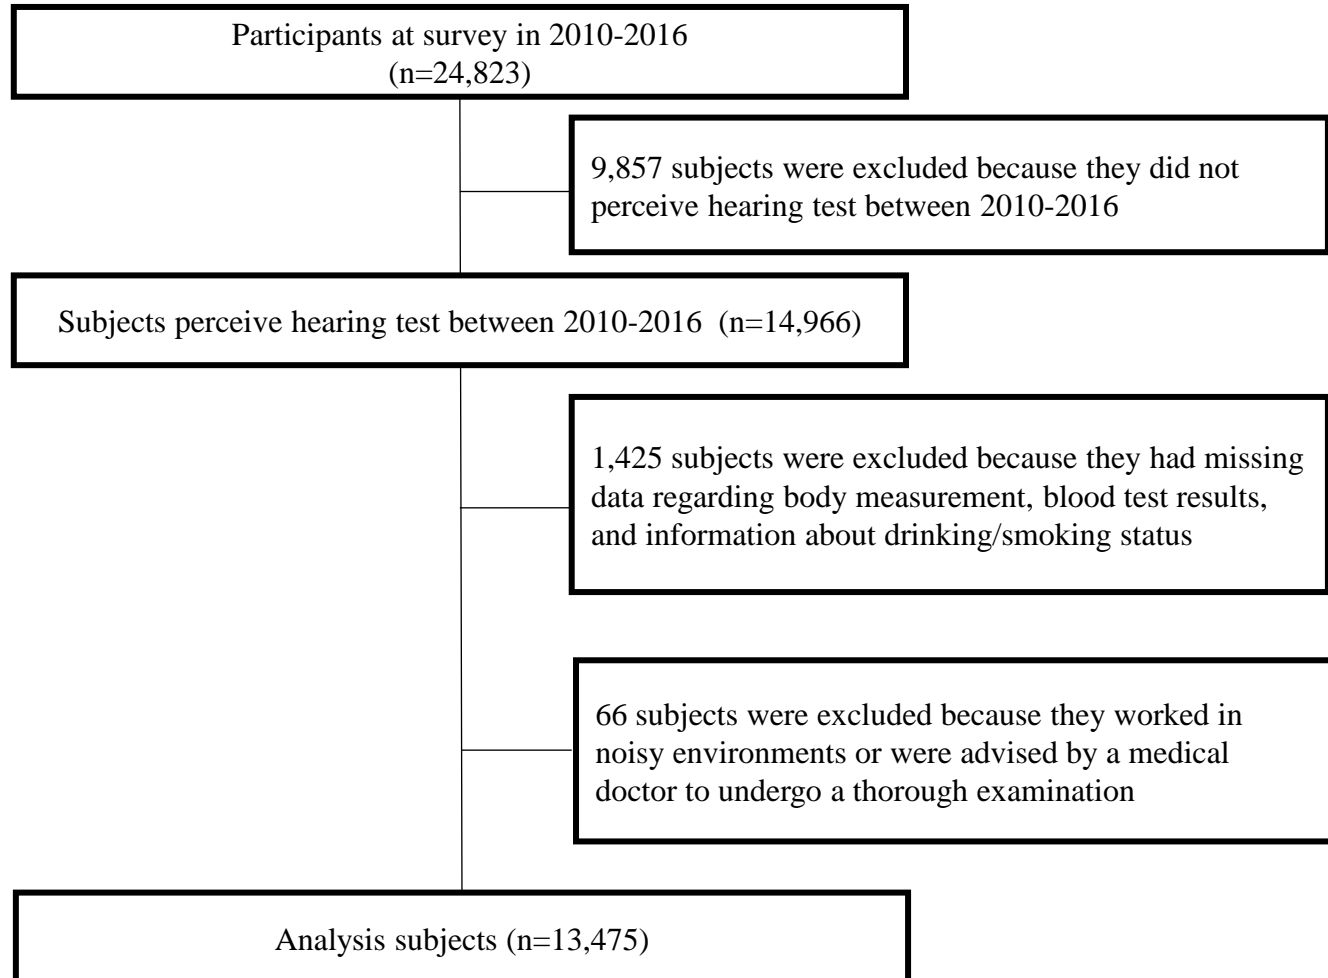

**STROBE 2007 (v4) Statement—Checklist of items that should be included in reports of *cross-sectional studies***

| Section/Topic                | Item # | Recommendation                                                                                                                                                                       | Reported on page #                        |
|------------------------------|--------|--------------------------------------------------------------------------------------------------------------------------------------------------------------------------------------|-------------------------------------------|
| <b>Title and abstract</b>    | 1      | (a) Indicate the study’s design with a commonly used term in the title or the abstract                                                                                               | 1                                         |
|                              |        | (b) Provide in the abstract an informative and balanced summary of what was done and what was found                                                                                  | 2-3                                       |
| <b>Introduction</b>          |        |                                                                                                                                                                                      |                                           |
| Background/rationale         | 2      | Explain the scientific background and rationale for the investigation being reported                                                                                                 | 5                                         |
| Objectives                   | 3      | State specific objectives, including any prespecified hypotheses                                                                                                                     | 5-6                                       |
| <b>Methods</b>               |        |                                                                                                                                                                                      |                                           |
| Study design                 | 4      | Present key elements of study design early in the paper                                                                                                                              | 7                                         |
| Setting                      | 5      | Describe the setting, locations, and relevant dates, including periods of recruitment, exposure, follow-up, and data collection                                                      | 7-9                                       |
| Participants                 | 6      | (a) Give the eligibility criteria, and the sources and methods of selection of participants                                                                                          | 7                                         |
| Variables                    | 7      | Clearly define all outcomes, exposures, predictors, potential confounders, and effect modifiers. Give diagnostic criteria, if applicable                                             | 7-8                                       |
| Data sources/<br>measurement | 8*     | For each variable of interest, give sources of data and details of methods of assessment (measurement). Describe comparability of assessment methods if there is more than one group | 7-9                                       |
| Bias                         | 9      | Describe any efforts to address potential sources of bias                                                                                                                            | 14-15                                     |
| Study size                   | 10     | Explain how the study size was arrived at                                                                                                                                            | 7                                         |
| Quantitative variables       | 11     | Explain how quantitative variables were handled in the analyses. If applicable, describe which groupings were chosen and why                                                         | 8-9                                       |
| Statistical methods          | 12     | (a) Describe all statistical methods, including those used to control for confounding                                                                                                | 8-9                                       |
|                              |        | (b) Describe any methods used to examine subgroups and interactions                                                                                                                  | 9                                         |
|                              |        | (c) Explain how missing data were addressed                                                                                                                                          | 7(we excluded subjects with missing data) |
|                              |        | (d) If applicable, describe analytical methods taking account of sampling strategy                                                                                                   | N/A                                       |

|                          |     |                                                                                                                                                                                                              |               |
|--------------------------|-----|--------------------------------------------------------------------------------------------------------------------------------------------------------------------------------------------------------------|---------------|
|                          |     | (e) Describe any sensitivity analyses                                                                                                                                                                        | N/A           |
| <b>Results</b>           |     |                                                                                                                                                                                                              |               |
| Participants             | 13* | (a) Report numbers of individuals at each stage of study—eg numbers potentially eligible, examined for eligibility, confirmed eligible, included in the study, completing follow-up, and analysed            | 7             |
|                          |     | (b) Give reasons for non-participation at each stage                                                                                                                                                         | 7             |
|                          |     | (c) Consider use of a flow diagram                                                                                                                                                                           | figure 1      |
| Descriptive data         | 14* | (a) Give characteristics of study participants (eg demographic, clinical, social) and information on exposures and potential confounders                                                                     | 10, table 1   |
|                          |     | (b) Indicate number of participants with missing data for each variable of interest                                                                                                                          | N/A           |
| Outcome data             | 15* | Report numbers of outcome events or summary measures                                                                                                                                                         | 10            |
| Main results             | 16  | (a) Give unadjusted estimates and, if applicable, confounder-adjusted estimates and their precision (eg, 95% confidence interval). Make clear which confounders were adjusted for and why they were included | table 2 and 3 |
|                          |     | (b) Report category boundaries when continuous variables were categorized                                                                                                                                    | N/A           |
|                          |     | (c) If relevant, consider translating estimates of relative risk into absolute risk for a meaningful time period                                                                                             | N/A           |
| Other analyses           | 17  | Report other analyses done—eg analyses of subgroups and interactions, and sensitivity analyses                                                                                                               | table 3       |
| <b>Discussion</b>        |     |                                                                                                                                                                                                              |               |
| Key results              | 18  | Summarise key results with reference to study objectives                                                                                                                                                     | 11            |
| Limitations              | 19  | Discuss limitations of the study, taking into account sources of potential bias or imprecision. Discuss both direction and magnitude of any potential bias                                                   | 14-15         |
| Interpretation           | 20  | Give a cautious overall interpretation of results considering objectives, limitations, multiplicity of analyses, results from similar studies, and other relevant evidence                                   | 12-14         |
| Generalisability         | 21  | Discuss the generalisability (external validity) of the study results                                                                                                                                        | 14            |
| <b>Other information</b> |     |                                                                                                                                                                                                              |               |
| Funding                  | 22  | Give the source of funding and the role of the funders for the present study and, if applicable, for the original study on which the present article is based                                                | 16            |

\*Give information separately for cases and controls in case-control studies and, if applicable, for exposed and unexposed groups in cohort and cross-sectional studies.

**Note:** An Explanation and Elaboration article discusses each checklist item and gives methodological background and published examples of transparent reporting. The STROBE checklist is best used in conjunction with this article (freely available on the Web sites of PLoS Medicine at <http://www.plosmedicine.org/>, Annals of Internal Medicine at <http://www.annals.org/>, and Epidemiology at <http://www.epidem.com/>). Information on the STROBE Initiative is available at [www.strobe-statement.org](http://www.strobe-statement.org).

# BMJ Open

## Association between hypertension and hearing impairment in health check-ups among Japanese workers: a cross-sectional study

|                                 |                                                                                                                                                                                                                                                                                                                                                                                                                           |
|---------------------------------|---------------------------------------------------------------------------------------------------------------------------------------------------------------------------------------------------------------------------------------------------------------------------------------------------------------------------------------------------------------------------------------------------------------------------|
| Journal:                        | <i>BMJ Open</i>                                                                                                                                                                                                                                                                                                                                                                                                           |
| Manuscript ID                   | bmjopen-2018-028392.R2                                                                                                                                                                                                                                                                                                                                                                                                    |
| Article Type:                   | Research                                                                                                                                                                                                                                                                                                                                                                                                                  |
| Date Submitted by the Author:   | 02-Mar-2019                                                                                                                                                                                                                                                                                                                                                                                                               |
| Complete List of Authors:       | Umehara, Mitsumasa; Dokkyo Medical University, Department of Public Health<br>Sairenchi, Toshimi ; Dokkyo Medical University School of Medicine, Department of Public Health;<br>Haruyama, Yasuo; Dokkyo Medical University, Department of Public Health<br>Nagao, Masanori; Dokkyo Medical University, Department of Public Health<br>Kobashi, Gen; Dokkyo Medical University School of Medicine, Dept. of Public Health |
| <b>Primary Subject Heading</b>: | Epidemiology                                                                                                                                                                                                                                                                                                                                                                                                              |
| Secondary Subject Heading:      | Public health                                                                                                                                                                                                                                                                                                                                                                                                             |
| Keywords:                       | Epidemiology < TROPICAL MEDICINE, cross-sectional study, Hypertension < CARDIOLOGY, hearing impairment                                                                                                                                                                                                                                                                                                                    |
|                                 |                                                                                                                                                                                                                                                                                                                                                                                                                           |

SCHOLARONE™  
Manuscripts

1  
2  
3  
4  
5 **Association between hypertension and hearing impairment in health check-ups**  
6  
7  
8 **among Japanese workers: a cross-sectional study**  
9

10  
11  
12 Mitsumasa Umesawa, MD, PhD<sup>1</sup>, Toshimi Sairenchi, PhD<sup>1</sup>, Yasuo Haruyama, MD,  
13  
14 PhD<sup>1</sup>, Masanori Nagao, PhD<sup>1</sup>, Gen Kobashi, MD, PhD<sup>1</sup>  
15  
16

17  
18  
19 <sup>1</sup> Department of Public Health, Dokkyo Medical University  
20  
21  
22

23  
24  
25  
26 **Corresponding author**  
27

28 Mitsumasa Umesawa  
29

30  
31 Department of Public Health, Dokkyo Medical University, Mibu 321-0293, Japan  
32

33 Tel.: +81-282-87-2133  
34

35 Fax: +81-282-86-2935  
36

37 Email: umesawa@dokkyomed.ac.jp  
38  
39  
40  
41

42 Word count: 2,715 words  
43  
44  
45  
46  
47  
48  
49  
50  
51  
52  
53  
54  
55  
56  
57  
58  
59  
60

## Abstract

**Objectives:** Prevention of hearing impairment (HI) is important because recovery of hearing is typically difficult. Epidemiological studies have examined the risk factors for HI. However, the association between hypertension and HI remains unclear. We aimed to clarify the association between hypertension and HI.

**Design:** Cross-sectional study.

**Setting:** Japanese workers in an information and communication technologies company.

**Participants:** Of 24,823 employees of the same company, we recruited 13,475 participants who underwent hearing testing by audiometry in annual health checkups and did not have missing data regarding body measurement, blood test results, and drinking/smoking status (mean age: 49.4 years; males: 86.4%).

**Primary outcomes:** Hearing tests were performed at two frequencies (1 kHz, 4 kHz). We defined the inability of participants to respond to 30 dB at 1 kHz and/or 40 dB at 4 kHz as overall moderate HI. We also defined moderate HI at 1 kHz or 4 kHz as an abnormal finding at 1 kHz or 4 kHz. We defined hypertension as  $\geq 140$  mmHg systolic blood pressure and/or  $\geq 90$  mmHg diastolic blood pressure and/or taking medication for hypertension. We examined the association between hypertension and HI after adjusting for age, sex, body mass index, smoking/drinking status, diabetes mellitus, hyperlipidemia and proteinuria.

**Results:** Moderate HI was identified in 980 participants (7.3%). Of these, 441 participants (3.3%) exhibited moderate HI at 1 kHz, and 787 participants (5.8%) exhibited moderate HI at 4 kHz. Subjects with hypertension showed a higher prevalence of any hearing impairment. The prevalence of overall moderate HI, moderate HI at 1

1  
2  
3  
4  
5 kHz and moderate HI at 4 kHz among subjects with hypertension was 8.7%, 4.3% and  
6  
7 6.8%, while those among subjects without hypertension was 6.9%, 3.0% and 5.6% ( $P <$   
8  
9 0.01,  $P < 0.01$  and  $P = 0.01$ , respectively).  
10  
11

12 **Conclusions:** Hypertension was associated with moderate HI in Japanese workers.

13  
14 (299/300 words)  
15  
16  
17  
18  
19  
20  
21  
22  
23  
24  
25  
26  
27  
28  
29  
30  
31  
32  
33  
34  
35  
36  
37  
38  
39  
40  
41  
42  
43  
44  
45  
46  
47  
48  
49  
50  
51  
52  
53  
54  
55  
56  
57  
58  
59  
60



### Strength and limitations of this study

- This study was based on annual health check-ups which were conducted according to Japanese law; therefore, study participants comprised both healthy and unhealthy individuals.
- Our research was unable to use precise information on hearing tests compared with tests conducted in hospitals because this study is based on health check-ups that are mandated by law.
- We were unable to adjust family history of hearing impairment because it was not included in ascertained family history of illness.

## Introduction

Hearing impairment (HI) is a common condition among older people. The Global Burden of Disease Study estimated that HI is one of eight chronic diseases and injuries affecting more than 10% of the world's population[1]. According to the World Health Organization (WHO) fact sheet published in March 2018, almost one-third of people aged 65 years or older have HI[2].

Prevention of HI is an important public health issue not only because HI makes communication difficult, but also because it is associated with death, depression and dementia[3-7]. A recent review reported that HI in midlife (45–65 years old) is associated with the risk of dementia in future[8].

Recovery from HI is typically difficult, and several epidemiological studies have been conducted in an attempt to identify the risk factors for HI. Many risk factors for HI have been identified, including aging, exposure to loud noise, and medication. Of these, many previous studies have examined the associations between cardiovascular risk factors and HI. A meta-analysis of 13 cross-sectional studies revealed that, compared with persons without a diabetic condition, a higher prevalence of HI was observed in persons with diabetes mellitus[9]. For serum lipids, compared with male participants who had a lower high-density lipoprotein (HDL) cholesterol concentration, hearing levels at high frequencies were significantly better among male participants with a higher HDL cholesterol concentration[10]. In relation to proteinuria, we previously examined a relationship between degree of dipstick proteinuria and prevalence of HI in another Japanese worker group and found that subjects with severe dipstick proteinuria had higher prevalence of HI compared with subject without proteinuria[11]. A recent study in Australia reported that current smoking, obesity, high

1  
2  
3  
4  
5 serum triglycerides and brachial-ankle pulse wave velocity were positively associated  
6  
7 with hearing loss in addition to diabetic condition and serum HDL cholesterol  
8  
9 levels[12]. Regarding hypertension, several epidemiological studies examined the  
10  
11 association between hypertension and HI. However, the results of these studies were  
12  
13 inconsistent[12-17]. Cross-sectional studies reported a positive association between  
14  
15 hypertension and HI in Korea and in Indian workers in the iron and steel industries[13,  
16  
17 14]. The same association was observed in a case-control study in Brazil, which also  
18  
19 reported a positive association between hypertension and hearing loss[15]. A  
20  
21 preliminary study in Mexico reported that hypertensive participants exhibited HI in  
22  
23 relation to an 8 kHz pure tone sound, compared with participants without  
24  
25 hypertension[16]. The Australian study mentioned above also reported that systolic and  
26  
27 diastolic blood pressure level were positively associated with hearing thresholds of the  
28  
29 best ear, especially for low frequency sounds[12]. However, a cross-sectional study of  
30  
31 Hispanic/Latino participants in the United States found no such association[17].  
32  
33  
34  
35  
36

37  
38 Therefore, we aimed to examine the association between hypertension and HI  
39  
40 in Japan. The prevalence of high blood pressure in Japan is equal to or higher than that  
41  
42 in the UK and the United States[18]. If hypertension is positively associated with HI,  
43  
44 early intervention for hypertension may be beneficial for preventing HI. We  
45  
46 hypothesized that hypertension would be positively associated with HI. To test this  
47  
48 hypothesis, we conducted an association study among Japanese workers.  
49  
50  
51  
52  
53  
54  
55  
56  
57  
58  
59  
60

## Methods

### *Participants*

Participants were 18-to-81-year-old employees of Fujitsu Limited, an information and communication technologies company. We recruited a total of 24,823 participants (20,732 men and 4,091 women) who underwent annual health check-ups between 2010 and 2016. For participants who had undergone annual health check-ups twice or more, we analyzed the most recent data. We excluded 9,857 participants who did not undergo hearing tests using audiometry from the analysis. In addition, we excluded 1,425 participants who had missing data regarding body measurement, blood test results, and information about drinking/smoking status. We also excluded 66 participants who worked in noisy environments or who were advised by a medical doctor to undergo a thorough examination, because they were presumed to be likely to exhibit a higher prevalence of HI. In Japan's guideline, 85 dB is a value to be recognized as noisy work environment. Consequently, we included data from 13,475 participants (11,636 males and 1,839 females) in the final analyses. (Figure 1)

We used anonymized data with the permission of Fujitsu Limited.

### *Risk factor survey*

The annual health check-up was conducted as required by the Industrial Safety and Health Act under Japanese law. The check-up consisted of body height and weight measurement with light clothing, ascertaining medical history including hypertension, diabetes mellitus, serum lipid abnormality, high serum uric acid and liver dysfunction, drinking/smoking status, a hearing test, a vision test, blood pressure measurement, blood test including serum lipids, hepatic enzymes, serum glucose, hemoglobin A1c,

1  
2  
3  
4  
5 uric acid and blood count, and the dipstick urine test. Family history of illness such as  
6  
7 cancer, stroke, coronary heart disease, hypertension and diabetes mellitus was  
8  
9 ascertained. Participants had their blood pressure levels measured by automated  
10  
11 sphygmomanometers on the arm. If the blood pressure level was high, the measurement  
12  
13 was repeated. The hearing test was performed using audiometry. In accordance with  
14  
15 Japanese law, two categories of hearing tests were applied at 1 kHz and 4 kHz for each  
16  
17 ear. Inability to respond to 30 dB at 1 kHz and/or 40 dB at 4 kHz was defined as the  
18  
19 threshold for “abnormal”. In addition, 11,709 of 13,475 participants tested their hearing  
20  
21 thresholds every 5 dB between –10 dB and 90 dB in 1 kHz and 4 kHz. We calculated  
22  
23 the mean hearing threshold as a mean of 1 kHz and 4 kHz in both ears. For HbA1c, the  
24  
25 National Glycohemoglobin Standardization Program (NGSP) value was used.  
26  
27  
28  
29  
30  
31  
32

### 33 *Definition of variables*

34  
35 We defined hypertension as  $\geq 140$  mmHg systolic blood pressure and/or  $\geq 90$  mmHg  
36  
37 diastolic blood pressure and/or taking medication for hypertension. For HI, we defined a  
38  
39 participant as having overall moderate HI (overall moderate HI), if there was an  
40  
41 abnormal finding in any one category. Likewise, we defined moderate HI at 1 kHz (4  
42  
43 kHz) as an abnormal finding at 1 kHz (4 kHz). Also, we defined mean mild HI as a  
44  
45 mean hearing threshold of  $>25$  dB and  $\leq 40$  dB, and defined mean moderate to severe HI  
46  
47 as a mean hearing threshold more than 40 dB[19]. For other variables, we defined  
48  
49 diabetes mellitus as  $\geq 6.5\%$  HbA1c and/or taking medication for diabetes mellitus, high  
50  
51 serum cholesterol level as  $\geq 220$  mg/dl and/or taking medication for  
52  
53 hypercholesterolemia, and proteinuria as dipstick proteinuria 1+ or more in a urine test.  
54  
55  
56  
57  
58 Body mass index (BMI) values were calculated as follows: weight in kilograms divided  
59  
60

1  
2  
3  
4  
5 by height in meters squared.  
6  
7  
8  
9

### 10 *Statistical analysis*

11  
12 We calculated the characteristics of participants according to the presence of  
13  
14 hypertension. The characteristics included variables as age, sex, BMI, systolic and  
15  
16 diastolic blood pressure, blood test, dipstick proteinuria, current smoking, current  
17  
18 drinking, and medication for hypertension, hypercholesterolemia, and diabetes mellitus.  
19  
20 Blood test included HbA1c level and serum lipid level. We calculated age and  
21  
22 sex-adjusted prevalence of overall moderate HI and moderate HI at 1 kHz and 4 kHz  
23  
24 according to the presence of hypertension (model 1). In addition, we calculated the  
25  
26 multivariable-adjusted prevalence of HI. We used confounding variables for adjustment,  
27  
28 including age, sex, BMI (kg/m<sup>2</sup>), current drinker (yes or no), current smoker (yes or no),  
29  
30 diabetes mellitus (yes or no), hypercholesterolemia (yes or no) and proteinuria (yes or  
31  
32 no) (model 2). We also examined the association between hypertension and mean mild  
33  
34 or moderate to severe HI. We tested for sex interaction in each analysis and found no  
35  
36 significant interactions.  
37  
38  
39  
40  
41

42 We used SAS version 9.4 software (SAS Institute, Cary, NC) for all analyses.

43  
44 *P*-values <0.05 were regarded as statistically significant.  
45  
46  
47  
48

### 49 *Ethics*

50  
51 The study protocol of the present study was approved by the Ethics Committee of  
52  
53 Dokkyo Medical University (Univ-28018).  
54  
55  
56  
57

### 58 *Patient and public involvement*

1  
2  
3  
4  
5 The Ethics Committee of Dokkyo Medical University involved community views.  
6  
7

8 Patients were not involved in the design or planning of the study.  
9  
10  
11  
12  
13  
14  
15  
16  
17  
18  
19  
20  
21  
22  
23  
24  
25  
26  
27  
28  
29  
30  
31  
32  
33  
34  
35  
36  
37  
38  
39  
40  
41  
42  
43  
44  
45  
46  
47  
48  
49  
50  
51  
52  
53  
54  
55  
56  
57  
58  
59  
60

For peer review only

## Results

Among 13,475 participants in the current study, 980 (7.3%) exhibited overall moderate HI. A total of 441 participants (3.3%) exhibited moderate HI at 1 kHz, and 787 participants (5.8%) exhibited moderate HI at 4 kHz. A total of 248 participants (1.8%) exhibited HI at both 1 kHz and 4 kHz. Among 11,709 participants in which the mean hearing threshold was calculated, 862 participants (7.4%) exhibited mean mild HI and 153 participants (1.3%) exhibited mean moderate to severe HI.

Table 1 shows the characteristics of participants according to the presence of hypertension. Compared with participants who did not have hypertension, participants with hypertension were older, with higher BMI values, higher blood pressure levels, and higher HbA1c levels. In addition, hypertensive participants were more likely to be male, more likely to take medication for diabetes mellitus and hypercholesterolemia, and less likely to have proteinuria.

Table 2 shows the prevalence of moderate HI according to the presence of hypertension. Compared with participants who did not have hypertension, participants with hypertension showed a higher prevalence of overall moderate HI and its subtypes. The prevalence of overall moderate HI among hypertensive participants was 8.7%, while that among participants who did not have hypertension was 6.9% (*P*-values for difference < 0.01). The prevalence rates of moderate HI at 1 kHz and 4 kHz among hypertensive participants were 4.3% and 6.8%, respectively, while those among participants who did not have hypertension were 3.0% and 5.6% (*P*-values for differences were <0.01 and 0.01).

Table 3 shows the associations between hypertension and severity of HI, as mean mild HI and mean moderate to severe HI, among participants for whom the mean



1  
2  
3  
4  
5 hearing threshold was calculated. After adjustment for confounding variables, the  
6 prevalence rates of mean mild HI and mean moderate to severe HI were 8.7% and 1.5%  
7 among participants with hypertension, while the prevalence rates were 6.9% and 1.3%  
8 among participants without hypertension (*P*-values for difference were <0.01 and 0.50).  
9  
10 In addition, we examined the association between severity of hypertension and severity  
11 of HI. However, there was no significant association between them.  
12  
13  
14  
15  
16  
17  
18

19 We also examined the association between hypertension and HI according to the  
20 number of ears with overall moderate HI. Participants with hypertension showed  
21 significantly higher prevalence of bilateral overall moderate HI, but not unilateral  
22 overall moderate HI, compared with participants without hypertension. The prevalence  
23 rates of bilateral overall moderate HI were 3.2% for hypertensive participants and 2.2%  
24 for non-hypertensive participants (*P*-value for the difference was <0.01), while those for  
25 unilateral overall moderate HI were 5.5% and 4.7%, respectively (*P*-value for difference  
26 = 0.09).  
27  
28  
29  
30  
31  
32  
33  
34  
35  
36  
37  
38  
39  
40  
41  
42  
43  
44  
45  
46  
47  
48  
49  
50  
51  
52  
53  
54  
55  
56  
57  
58  
59  
60

## Discussion

The current study revealed that participants with hypertension exhibited significantly higher prevalence of HI in all ranges, at both 1 kHz and 4 kHz, compared with participants without hypertension. In addition, participants with hypertension exhibited a higher prevalence of mean mild HI compared with participants without hypertension. However, no association was found between hypertension and mean moderate to severe HI.

A previous cross-sectional study in Korea revealed that hypertension was positively associated with the prevalence of HI[13]. Compared with participants without hypertension, odds ratios (ORs) and 95% confidence intervals (95% CIs) of participants with hypertension were 1.24 (1.10–1.42) for low/mid frequency mild HI, defined as an unaided pure tone hearing level for the superior ear of 26 to 40 dB in 0.5, 1.0 and 2.0 kHz conditions, and 1.29 (1.16–1.45) for high frequency mild HI, defined in the same way in the 3.0, 4.0 and 6.0 kHz conditions. In addition, a previous study in Korea reported that ORs and 95% CIs of participants with hypertension were 1.19 (1.02–1.39) for low/mid frequency moderate-to-profound HI defined as an unaided pure tone hearing level for the superior ear of 41 dB or more in 0.5, 1.0 and 2.0 kHz conditions, and 1.20 (1.07–1.35) for high frequency moderate-to-profound HI, defined in the same way in 3.0, 4.0 and 6.0 kHz conditions. In the present study, the results revealed that participants with hypertension had a higher prevalence of HI for both 1 kHz and 4 kHz stimuli. We found a positive association between hypertension and the prevalence of mild HI. However, the association between hypertension and the prevalence of moderate to severe HI was not significant. We speculate that the smaller number of cases of moderate to severe HI, based on the lower proportion of older subjects, was

1  
2  
3  
4  
5 likely to have caused the difference between the present study and the previous study in  
6  
7 Korea. A cross-sectional study of Hispanic/Latino participants in the United States  
8  
9 reported that the association between hypertension and total HI was not significant,  
10  
11 whereas the association between hypertension and bilateral HI was significant[17]. In  
12  
13 the present study, participants with hypertension showed significantly higher prevalence  
14  
15 of bilateral HI, but not unilateral HI.  
16  
17

18  
19 Consideration of the difference between low frequency and high frequency HI  
20  
21 in the current findings may be valuable. The present study and the previous study in  
22  
23 Korea indicated that subjects with hypertension had higher prevalence of both lower and  
24  
25 higher frequency HI, compared with subjects without hypertension[13]. However, the  
26  
27 study in Mexico reported an association between hypertension and higher hearing  
28  
29 thresholds in 8 kHz, but not for lower frequencies[16]. The study in Australia reported  
30  
31 an association between hypertension and the best ear low-frequency average, but not the  
32  
33 high-frequency average[12]. Although the number of previous studies is limited, it is  
34  
35 possible that a clear relationship between hypertension and HI exists in Asian  
36  
37  
38  
39  
40  
41 populations.

42  
43 The recent cross-sectional study in Australia revealed that Framingham risk  
44  
45 scores were positively associated with both best ear low-frequency average and  
46  
47 high-frequency average values[12]. We also examined the association between  
48  
49 Framingham risk score and prevalence of HI, and found that prevalence of total HI, HI  
50  
51 in 1 kHz, HI in 4 kHz, mean mild HI and mean moderate to severe HI was significantly  
52  
53 higher in the high-scoring group (5 or more points) compared with the low-scoring  
54  
55 group (-15 to 1 point) (data not shown).  
56  
57

58  
59 The mechanism underlying the association between hypertension and HI is  
60

1  
2  
3  
4  
5 uncertain, but our findings and those of previous studies imply that micro-vessel  
6 damage may lead to HI. Hypertension is one of the major risk factors of peripheral  
7 arterial disease[20-23]. The inner ear depends on the supply of oxygen and nutrition in  
8 the labyrinthine artery. This artery is a thin branch of the anterior inferior cerebellar  
9 artery. Therefore, micro-vessel atherosclerosis caused by hypertension may be  
10 associated with a reduction in the level of oxygen and the nutrition supply for the inner  
11 ear. In a previous study using an animal model, organ blood flow was found to be lower  
12 in spontaneously hypertensive rats compared with normotensive rats [24]. In addition,  
13 hypertension may be associated with brain damage. In the present study, the effect of  
14 hypertension on HI was clear for bilateral HI. We assumed that hypertension may  
15 damage not only the inner ear but also the primary auditory cortex.  
16  
17  
18  
19  
20  
21  
22  
23  
24  
25  
26  
27  
28  
29

30  
31 The present study had several limitations that should be considered. First, the  
32 cross-sectional design of the present study did not allow us to establish a causal  
33 relationship. Second, we were unable to evaluate the association between hypertension  
34 and hearing thresholds other than 1 kHz and 4 kHz, because this study was based on  
35 annual health check-ups, whose items were prescribed by Japanese law. In addition, we  
36 were unable to conduct a survey with unified measurement protocols, including the type  
37 of audiometer and automated sphygmomanometer, because the surveys were conducted  
38 in multiple centers over several years and the accuracy management of survey is left to  
39 each health check-up agency in Japan. Moreover, we were unable to evaluate the impact  
40 of family history of HI, because it was not included in the survey. Third, we were  
41 unable to evaluate the precise history of noise exposure because the data were  
42 anonymous and did not contain a precise history of noise exposure before 2010.  
43  
44  
45  
46  
47  
48  
49  
50  
51  
52  
53  
54  
55  
56  
57

58 Therefore, the present study design did not enable us to comprehensively evaluate the  
59  
60

1  
2  
3  
4  
5 effects of noise exposure. In addition, we were unable to adjust for work-related factors  
6  
7 because of anonymity. Finally, because the current study was based on the results of  
8  
9 annual health check-ups in a single company which mainly consisted of male staff, the  
10  
11 generalizability of the current findings is unclear.  
12  
13

14  
15 The present study showed that hypertensive subjects had higher prevalence of  
16  
17 HI. Even in clinical practice, by recognizing the association stated above, it may be  
18  
19 beneficial to detect subjects with HI at the early stage.  
20  
21

22  
23 In conclusion, the current findings revealed that hypertension was positively  
24  
25 associated with the prevalence of HI in Japanese workers. The association was evident  
26  
27 for mild HI and bilateral HI. Further studies will be necessary to confirm this finding.  
28  
29  
30  
31  
32  
33  
34  
35  
36  
37  
38  
39  
40  
41  
42  
43  
44  
45  
46  
47  
48  
49  
50  
51  
52  
53  
54  
55  
56  
57  
58  
59  
60

## Acknowledgments

We thank Benjamin Knight, MSc., from Edanz Group ([www.edanzediting.com/ac](http://www.edanzediting.com/ac)) for editing a draft of this manuscript.

## Funding

This work was supported by JSPS Grant Number JP17K18051.

## Contributors

MU and GK designed this study. MU and GK obtained the data set. MU, TS, YH, MN and GK analyzed the data. MU wrote the first draft of the manuscript. TS, YH, MN and GK commented on the manuscript.

## Competing interests

None declared.

## Data sharing statement

We used data of annual health check-ups between 2010 to 2016 with the permission of Fujitsu Limited. We cannot share the data because of contract with Fujitsu Limited. The raw data of the present study is managed in Department of Public Health, Dokkyo Medical University.

1  
2  
3  
4  
5 **Figure Legends**  
6

7  
8 Figure 1. Study subjects.  
9  
10  
11  
12  
13  
14  
15  
16  
17  
18  
19  
20  
21  
22  
23  
24  
25  
26  
27  
28  
29  
30  
31  
32  
33  
34  
35  
36  
37  
38  
39  
40  
41  
42  
43  
44  
45  
46  
47  
48  
49  
50  
51  
52  
53  
54  
55  
56  
57  
58  
59  
60

For peer review only

## References

1. GBD 2015 Disease and Injury Incidence and Prevalence Collaborators. Global, regional, and national incidence, prevalence, and years lived with disability for 310 diseases and injuries, 1990-2015: a systematic analysis for the Global Burden of Disease Study 2015. *Lancet*. 2016;388:1545-602.
2. WHO. Fact sheets (15 March 2018), Deafness and hearing loss. <https://www.who.int/news-room/fact-sheets/detail/deafness-and-hearing-loss> (accessed 26 Jan 2019).
3. Lin FR, Metter EJ, O'Brien RJ, et al. Hearing loss and incident dementia. *Arch Neurol*. 2011;68:214-20.
4. Davies HR, Cadar D, Herbert A, et al. Hearing Impairment and Incident Dementia: Findings from the English Longitudinal Study of Ageing. *J Am Geriatr Soc*. 2017;65:2074-81.
5. Deal JA, Betz J, Yaffe K, et al. Hearing Impairment and Incident Dementia and Cognitive Decline in Older Adults: The Health ABC Study. *J Gerontol A Biol Sci Med Sci*. 2017;72:703-9.
6. Contrera KJ, Betz J, Genther DJ, et al. Association of Hearing Impairment and Mortality in the National Health and Nutrition Examination Survey. *JAMA Otolaryngol Head Neck Surg*. 2015;141:944-6.
7. Li CM, Zhang X, Hoffman HJ, et al. Hearing impairment associated with depression in US adults, National Health and Nutrition Examination Survey 2005-2010. *JAMA Otolaryngol Head Neck Surg*. 2014;140:293-302.
8. Livingston G, Sommerlad A, Orgeta V, et al. Dementia prevention, intervention, and care. *Lancet*. 2017;390:2673-734



- 1  
2  
3  
4  
5  
6  
7  
8  
9  
10  
11  
12  
13  
14  
15  
16  
17  
18  
19  
20  
21  
22  
23  
24  
25  
26  
27  
28  
29  
30  
31  
32  
33  
34  
35  
36  
37  
38  
39  
40  
41  
42  
43  
44  
45  
46  
47  
48  
49  
50  
51  
52  
53  
54  
55  
56  
57  
58  
59  
60
9. Horikawa C, Kodama S, Tanaka S, et al. Diabetes and risk of hearing impairment in adults: a meta-analysis. *J Clin Endocrinol Metab.* 2013;98:51-8.
10. Suzuki K, Kaneko M, Murai K. Influence of serum lipids on auditory function. *Laryngoscope.* 2000;110:1736-8.
11. Umesawa M, Hara M, Sairenchi T, et al. Association between dipstick proteinuria and hearing impairment in health check-ups among Japanese workers: a cross-sectional study. *BMJ Open.* 2018;8:e021427.
12. Tan HE, Lan NSR, Knuiman MW, et al. Associations between cardiovascular disease and its risk factors with hearing loss-A cross-sectional analysis. *Clin Otolaryngol.* 2018;43:172-81.
13. Hong JW, Jeon JH, Ku CR, et al. The prevalence and factors associated with hearing impairment in the Korean adults: the 2010-2012 Korea National Health and Nutrition Examination Survey (observational study). *Medicine (Baltimore).* 2015;94:e611.
14. Narlawar UW, Surjuse BG, Thakre SS. Hypertension and hearing impairment in workers of iron and steel industry. *Indian J Physiol Pharmacol.* 2006;50:60-6.
15. de Moraes Marchiori LL, de Almeida Rego Filho E, Matsuo T. Hypertension as a factor associated with hearing loss. *Braz J Otorhinolaryngol.* 2006;72:533-40.
16. Esparza CM, Jáuregui-Renaud K, Morelos CM, et al. Systemic high blood pressure and inner ear dysfunction: a preliminary study. *Clin Otolaryngol.* 2007;32:173-8.
17. Cruickshanks KJ, Dhar S, Dinces E, et al. Hearing Impairment Prevalence and Associated Risk Factors in the Hispanic Community Health Study/Study of Latinos. *JAMA Otolaryngol Head Neck Surg.* 2015;141:641-8.
18. Mills KT, Bundy JD, Kelly TN, et al. Global Disparities of Hypertension

1  
2  
3  
4  
5 Prevalence and Control: A Systematic Analysis of Population-Based Studies From  
6  
7  
8 90 Countries. *Circulation*. 2016;134:441-50.  
9

- 10  
11 19. Alford RL, Arnos KS, Fox M, et al. American College of Medical Genetics and  
12  
13 Genomics guideline for the clinical evaluation and etiologic diagnosis of hearing  
14  
15 loss. *Genet Med*. 2014;16:347-55.  
16  
17 20. Kitamura A, Iso H, Imano H, et al. Prevalence and correlates of carotid  
18  
19 atherosclerosis among elderly Japanese men. *Atherosclerosis*. 2004;172:353-9.  
20  
21 21. Matsunaga M, Yatsuya H, Iso H, et al. Similarities and differences between  
22  
23 coronary heart disease and stroke in the associations with cardiovascular risk  
24  
25 factors: The Japan Collaborative Cohort Study. *Atherosclerosis*. 2017;261:124-30.  
26  
27 22. Emdin CA, Anderson SG, Callender T, et al. Usual blood pressure, peripheral  
28  
29 arterial disease, and vascular risk: cohort study of 4.2 million adults. *BMJ*.  
30  
31 2015;351:h4865.  
32  
33 23. Matsunaga M, Yatsuya H, Iso H, et al. Similarities and differences between  
34  
35 coronary heart disease and stroke in the associations with cardiovascular risk  
36  
37 factors: The Japan Collaborative Cohort Study. *Atherosclerosis*. 2017;261:124-30.  
38  
39 24. Sugiyama M, Ohashi K, Sasaki T, et al. The effect of blood pressure on inner ear  
40  
41 blood flow. *Arch Otorhinolaryngol*. 1984;239:197-203.  
42  
43  
44  
45  
46  
47  
48  
49  
50  
51  
52  
53  
54  
55  
56  
57  
58  
59  
60

Table 1 Characteristics of subjects according to hypertension status

|                                                     | Subjects without hypertension |   |     | Subjects with hypertension |   |     | P for difference |
|-----------------------------------------------------|-------------------------------|---|-----|----------------------------|---|-----|------------------|
| N                                                   | 10,437                        |   |     | 3,038                      |   |     |                  |
| Age (years) <sup>1</sup>                            | 48.7                          | ± | 5.6 | 51.6                       | ± | 5.1 | <0.01            |
| Men (%)                                             | 84.2                          |   |     | 93.7                       |   |     | <0.01            |
| Body mass index (kg/m <sup>2</sup> ) <sup>2,3</sup> | 23.2                          | ± | 0.0 | 25.7                       | ± | 0.1 | <0.01            |
| Systolic blood pressure (mmHg) <sup>2,3</sup>       | 115.8                         | ± | 0.1 | 132.0                      | ± | 0.2 | <0.01            |
| Diastolic blood pressure (mmHg) <sup>2,3</sup>      | 72.2                          | ± | 0.1 | 85.5                       | ± | 0.2 | <0.01            |
| Medication for hypertension (%)                     | -                             |   |     | 63.4                       |   |     | -                |
| HbA1c (%) <sup>2,3</sup>                            | 5.6                           | ± | 0.0 | 5.8                        | ± | 0.0 | <0.01            |
| Medication for diabetes mellitus (%) <sup>2</sup>   | 3.0                           |   |     | 10.4                       |   |     | <0.01            |
| Total Cholesterol (mg/dl) <sup>2,3</sup>            | 207.0                         | ± | 0.3 | 205.4                      | ± | 0.6 | 0.03             |
| Triglyceride (mg/dl) <sup>2,3</sup>                 | 115.9                         | ± | 1.1 | 146.7                      | ± | 2.1 | <0.01            |
| Medication for dislipidemia (%) <sup>2</sup>        | 7.3                           |   |     | 18.8                       |   |     | <0.01            |
| Proteinuria (%) <sup>2</sup>                        | 3.6                           |   |     | 2.7                        |   |     | 0.02             |
| Current drinker (%) <sup>2</sup>                    | 74.9                          |   |     | 78.3                       |   |     | <0.01            |
| Current smoker (%) <sup>2</sup>                     | 22.0                          |   |     | 20.3                       |   |     | 0.06             |
| Total hearing impairment (%)                        | 6.2                           |   |     | 10.9                       |   |     | <0.01            |
| Hearing impairment in 1 kHz (%)                     | 2.7                           |   |     | 5.2                        |   |     | <0.01            |
| Hearing impairment in 4 kHz (%)                     | 5.0                           |   |     | 8.7                        |   |     | <0.01            |

<sup>1</sup> means ± standard deviation

<sup>2</sup> age, sex-adjusted

<sup>3</sup> means ± standard error

Table 2 Relationships between hypertension and hearing impairment

|                                                | Subjects without hypertension | Subjects with hypertension | P for difference |
|------------------------------------------------|-------------------------------|----------------------------|------------------|
| <b>Total hearing impairment</b>                |                               |                            |                  |
| N                                              | 10,437                        | 3,038                      |                  |
| Cases                                          | 650                           | 330                        |                  |
| Prevalence (%)                                 |                               |                            |                  |
| Model 1 (age, sex-adjusted)                    | 6.8%                          | 9.0%                       | <0.01            |
| Model 2 (multivariable-adjusted <sup>1</sup> ) | 6.9%                          | 8.7%                       | <0.01            |
| <b>Hearing impairment in 1 kHz</b>             |                               |                            |                  |
| N                                              | 10,437                        | 3,038                      |                  |
| Cases                                          | 284                           | 157                        |                  |
| Prevalence (%)                                 |                               |                            |                  |
| Model 1 (age, sex-adjusted)                    | 2.9%                          | 4.5%                       | <0.01            |
| Model 2 (multivariable-adjusted <sup>1</sup> ) | 3.0%                          | 4.3%                       | <0.01            |
| <b>Hearing impairment in 4 kHz</b>             |                               |                            |                  |
| N                                              | 10,437                        | 3,038                      |                  |
| Cases                                          | 524                           | 263                        |                  |
| Prevalence (%)                                 |                               |                            |                  |
| Model 1 (age, sex-adjusted)                    | 5.5%                          | 7.1%                       | <0.01            |
| Model 2 (multivariable-adjusted <sup>1</sup> ) | 5.6%                          | 6.8%                       | 0.01             |

<sup>1</sup> adjusted for age, sex, body mass index, current drinking (yes or no) , current smoking (yes or no), diabetes mellitus (yes or no), hyperlipidemia (yes or no) and proteinuria (yes or no)

Table 3 Relationships between hypertension and hearing impairment according to mean values

|                                                                                    | Subjects without hypertension | Subjects with hypertension | P for difference |
|------------------------------------------------------------------------------------|-------------------------------|----------------------------|------------------|
| Mean mild hearing impairment (mean hearing threshold >20dB and <=40dB)             |                               |                            |                  |
| N                                                                                  | 8,602                         | 2,531                      |                  |
| Cases                                                                              | 1186                          | 548                        |                  |
| Prevalence (%)                                                                     |                               |                            |                  |
| Model 1 (age, sex-adjusted)                                                        | 14.8%                         | 18.2%                      | <0.01            |
| Model 2 (multivariable-adjusted <sup>1</sup> )                                     | 15.1%                         | 17.1%                      | 0.02             |
| Mean moderate to severe hearing impairment (mean hearing threshold more than 40dB) |                               |                            |                  |
| N                                                                                  | 8,602                         | 2,531                      |                  |
| Cases                                                                              | 95                            | 50                         |                  |
| Prevalence (%)                                                                     |                               |                            |                  |
| Model 1 (age, sex-adjusted)                                                        | 1.2%                          | 1.6%                       | 0.11             |
| Model 2 (multivariable-adjusted <sup>1</sup> )                                     | 1.3%                          | 1.5%                       | 0.44             |

<sup>1</sup> adjusted for age, sex, body mass index, current drinking (yes or no) , current smoking (yes or no), diabetes mellitus (yes or no), hyperlipidemia (yes or no) and proteinuria (yes or no)

1  
2  
3  
4  
5  
6  
7  
8  
9  
10  
11  
12  
13  
14  
15  
16  
17  
18  
19  
20  
21  
22  
23  
24  
25  
26  
27  
28  
29  
30  
31  
32  
33  
34  
35  
36  
37  
38  
39  
40  
41

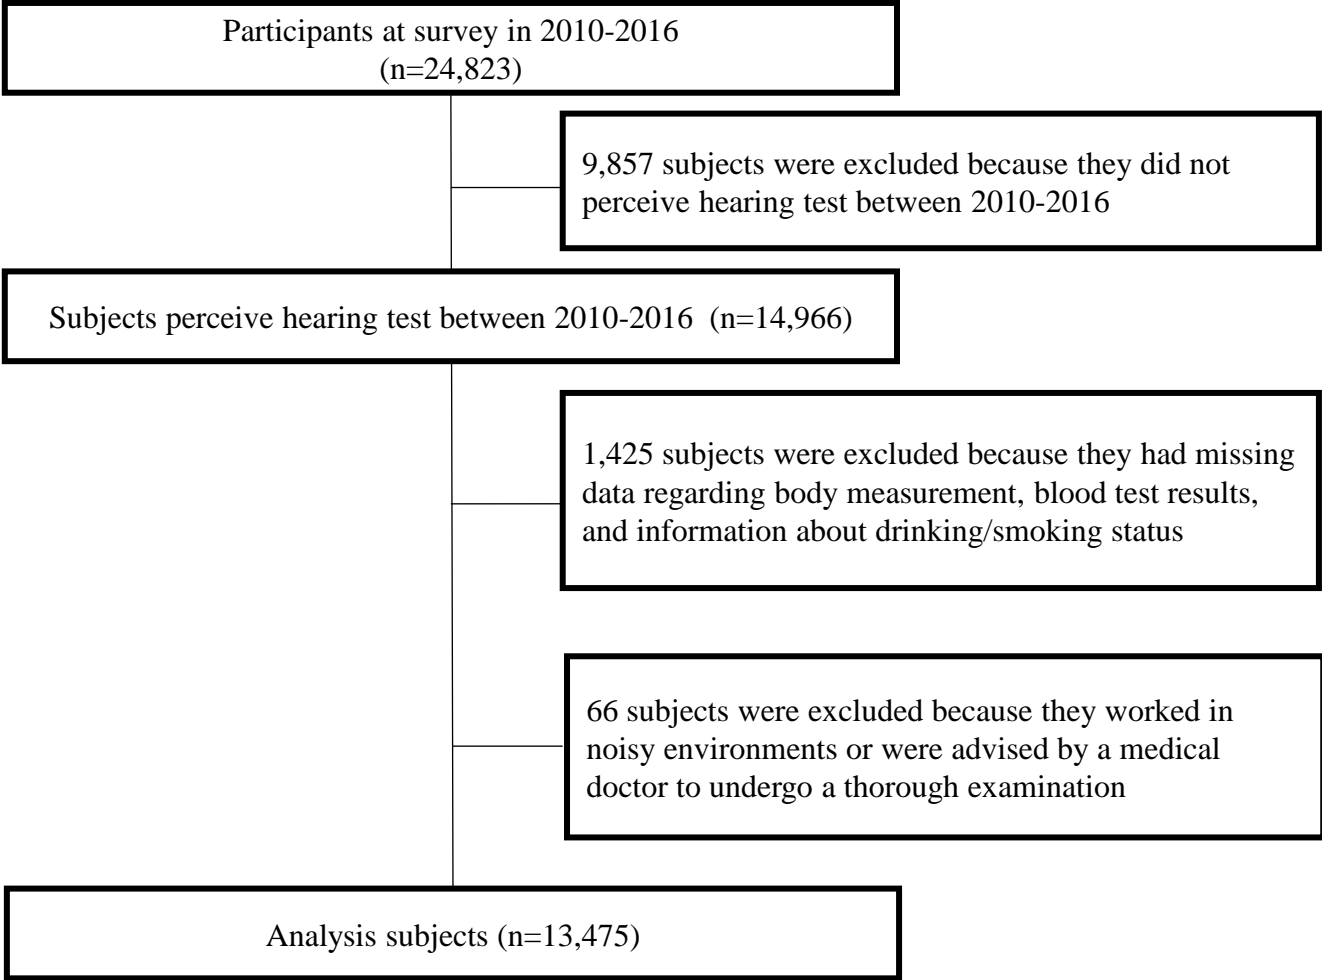

**STROBE 2007 (v4) Statement—Checklist of items that should be included in reports of *cross-sectional studies***

| Section/Topic                | Item # | Recommendation                                                                                                                                                                       | Reported on page #                         |
|------------------------------|--------|--------------------------------------------------------------------------------------------------------------------------------------------------------------------------------------|--------------------------------------------|
| <b>Title and abstract</b>    | 1      | (a) Indicate the study's design with a commonly used term in the title or the abstract                                                                                               | 1                                          |
|                              |        | (b) Provide in the abstract an informative and balanced summary of what was done and what was found                                                                                  | 2-3                                        |
| <b>Introduction</b>          |        |                                                                                                                                                                                      |                                            |
| Background/rationale         | 2      | Explain the scientific background and rationale for the investigation being reported                                                                                                 | 5                                          |
| Objectives                   | 3      | State specific objectives, including any prespecified hypotheses                                                                                                                     | 5-6                                        |
| <b>Methods</b>               |        |                                                                                                                                                                                      |                                            |
| Study design                 | 4      | Present key elements of study design early in the paper                                                                                                                              | 7                                          |
| Setting                      | 5      | Describe the setting, locations, and relevant dates, including periods of recruitment, exposure, follow-up, and data collection                                                      | 7-9                                        |
| Participants                 | 6      | (a) Give the eligibility criteria, and the sources and methods of selection of participants                                                                                          | 7                                          |
| Variables                    | 7      | Clearly define all outcomes, exposures, predictors, potential confounders, and effect modifiers. Give diagnostic criteria, if applicable                                             | 7-8                                        |
| Data sources/<br>measurement | 8*     | For each variable of interest, give sources of data and details of methods of assessment (measurement). Describe comparability of assessment methods if there is more than one group | 7-9                                        |
| Bias                         | 9      | Describe any efforts to address potential sources of bias                                                                                                                            | 14-15                                      |
| Study size                   | 10     | Explain how the study size was arrived at                                                                                                                                            | 7                                          |
| Quantitative variables       | 11     | Explain how quantitative variables were handled in the analyses. If applicable, describe which groupings were chosen and why                                                         | 8-9                                        |
| Statistical methods          | 12     | (a) Describe all statistical methods, including those used to control for confounding                                                                                                | 8-9                                        |
|                              |        | (b) Describe any methods used to examine subgroups and interactions                                                                                                                  | 9                                          |
|                              |        | (c) Explain how missing data were addressed                                                                                                                                          | 7 (we excluded subjects with missing data) |
|                              |        | (d) If applicable, describe analytical methods taking account of sampling strategy                                                                                                   | N/A                                        |

|                          |     |                                                                                                                                                                                                              |               |
|--------------------------|-----|--------------------------------------------------------------------------------------------------------------------------------------------------------------------------------------------------------------|---------------|
|                          |     | (e) Describe any sensitivity analyses                                                                                                                                                                        | N/A           |
| <b>Results</b>           |     |                                                                                                                                                                                                              |               |
| Participants             | 13* | (a) Report numbers of individuals at each stage of study—eg numbers potentially eligible, examined for eligibility, confirmed eligible, included in the study, completing follow-up, and analysed            | 7             |
|                          |     | (b) Give reasons for non-participation at each stage                                                                                                                                                         | 7             |
|                          |     | (c) Consider use of a flow diagram                                                                                                                                                                           | figure 1      |
| Descriptive data         | 14* | (a) Give characteristics of study participants (eg demographic, clinical, social) and information on exposures and potential confounders                                                                     | 10, table 1   |
|                          |     | (b) Indicate number of participants with missing data for each variable of interest                                                                                                                          | N/A           |
| Outcome data             | 15* | Report numbers of outcome events or summary measures                                                                                                                                                         | 10            |
| Main results             | 16  | (a) Give unadjusted estimates and, if applicable, confounder-adjusted estimates and their precision (eg, 95% confidence interval). Make clear which confounders were adjusted for and why they were included | table 2 and 3 |
|                          |     | (b) Report category boundaries when continuous variables were categorized                                                                                                                                    | N/A           |
|                          |     | (c) If relevant, consider translating estimates of relative risk into absolute risk for a meaningful time period                                                                                             | N/A           |
| Other analyses           | 17  | Report other analyses done—eg analyses of subgroups and interactions, and sensitivity analyses                                                                                                               | table 3       |
| <b>Discussion</b>        |     |                                                                                                                                                                                                              |               |
| Key results              | 18  | Summarise key results with reference to study objectives                                                                                                                                                     | 11            |
| Limitations              | 19  | Discuss limitations of the study, taking into account sources of potential bias or imprecision. Discuss both direction and magnitude of any potential bias                                                   | 14-15         |
| Interpretation           | 20  | Give a cautious overall interpretation of results considering objectives, limitations, multiplicity of analyses, results from similar studies, and other relevant evidence                                   | 12-14         |
| Generalisability         | 21  | Discuss the generalisability (external validity) of the study results                                                                                                                                        | 14            |
| <b>Other information</b> |     |                                                                                                                                                                                                              |               |
| Funding                  | 22  | Give the source of funding and the role of the funders for the present study and, if applicable, for the original study on which the present article is based                                                | 16            |

\*Give information separately for cases and controls in case-control studies and, if applicable, for exposed and unexposed groups in cohort and cross-sectional studies.

**Note:** An Explanation and Elaboration article discusses each checklist item and gives methodological background and published examples of transparent reporting. The STROBE checklist is best used in conjunction with this article (freely available on the Web sites of PLoS Medicine at <http://www.plosmedicine.org/>, Annals of Internal Medicine at <http://www.annals.org/>, and Epidemiology at <http://www.epidem.com/>). Information on the STROBE Initiative is available at [www.strobe-statement.org](http://www.strobe-statement.org).
